# Supplementary material for: Machine Learning Screening of Bile Acid-Binding Peptides in APeptide Database Derived From Food Proteins
Source: Research Square preprint supplement (doi:10.21203/rs.3.rs-209326/v1), 2021-02-19
Supplement: Supplementary file 1 [file 234398ab2cdc727db4154c0c.xlsx]

## Sheet: S1
	Isoelectric_point	Polarity	Hydropathy_index	Molecular_weight	Ph	Pt	Aroma
A	6	0	1.8	71.1	0.1046	-0.0044	0
R	10.76	52	-4.5	156.2	0.0727	-0.0085	0
N	5.41	3.38	-3.5	114.1	0.0257	0.0181	0
D	2.77	49.7	-3.5	115.1	0.0532	0.0167	0
C	5.05	1.48	2.5	103.2	-0.105	0.0025	0
Q	5.65	3.53	-3.5	128.1	0.0727	-0.0053	0
E	3.22	49.9	-3.5	129.1	0.0984	-0.0041	0
G	5.97	0	-0.4	57.1	-0.0686	0.0351	0
H	7.59	51.6	-3.2	137.1	-0.0315	0.0003	0
I	6.02	0.13	4.5	113.2	-0.1006	-0.0136	0
L	5.98	0.13	3.8	113.2	0.038	-0.0108	0
K	9.74	49.5	-3.9	128.2	0.0637	-0.0021	0
M	5.74	1.43	1.9	131.2	0.0427	-0.0047	0
F	5.48	0.35	2.8	147.2	-0.0554	-0.0114	1
P	6.3	1.58	-1.6	97.1	-0.038	0.0338	0
S	5.68	1.67	-0.8	87.1	-0.033	0.0104	0
T	5.66	1.66	-0.7	101.1	-0.0866	0.0049	0
W	5.89	2.1	-0.9	186.2	-0.0506	-0.0074	1
Y	5.66	1.61	-1.3	163.2	-0.0741	-0.0065	1
V	5.96	0.13	4.2	99.1	-0.1228	-0.0115	0

## Sheet: S2
	4-mer				5-mer				6-mer				7-mer
Number	Sequence	Average	SD		Sequence	Average	SD		Sequence	Average	SD		Sequence	Average	SD
1	RIYF	48082	23648		ADFRK	187866	34193.8		IRKYWV	262253	85429.3		AESFNKR	157255	19813.5
2	KWHV	47733.5	7129.65		FRAEK	183979	37805.6		RCATFK	240035	25837.4		QIRKNWA	130258	17069.5
3	IFWR	45087.6	27409		IRGPQ	183802	43714.7		HWFIRK	217072	28699.4		RPFKQLI	117045	23272.7
4	VRQW	43347.5	7988.35		FPRVG	167027	39088.2		PIYHGK	173106	46767.4		RPKAYGV	116032	7204.44
5	HYRI	43310.6	14190.6		AYNRG	164885	29400.5		PKNLWT	169727	54689.8		HNIYRPT	111182	39322.9
6	PYKV	43108.5	13779.7		IRFAN	161388	49862		SPRKYI	162714	7139.22		RMVKHDA	109732	35707.5
7	KHIR	42079.7	966.35		QYFMR	154291	8164.56		RWKSFG	162118	55561.7		HKARIEL	108658	10574.3
8	RMHN	41322.7	15021		DFKRI	153799	52783.8		RCMKDH	157569	67230.3		PHQIMRK	107673	12625.8
9	PIKL	40500.9	5253.83		WYARP	150865	14886.3		PWRLQG	148099	24344.3		ANRFYSH	106909	19364.3
10	TKRI	38935	41137.3		GRFDQ	150777	28827.5		PIRTKL	146122	25714.7		PMYQRHK	106883	15564.8
11	RHKT	38712	24097.3		LARVH	148501	40445.6		WKNILP	144628	21731.6		VRKDMWS	105953	15352.3
12	ISRC	35970.3	4221.94		RTCKQ	145980	53883.6		RAMYKI	141777	27879.4		RIMPKAV	104054	22402.3
13	WRVP	35580.6	2659.89		PRQHW	145453	44969.9		VAQYRK	133780	59063.3		PLENRSY	102602	19131.3
14	PMTR	35547.8	1652.74		RSYLM	144702	39051.9		PKFGVH	133252	60131.6		PNRHIEK	101837	23386.5
15	QWFK	35422.2	8569.51		ALRNG	143082	18114.5		NWFGRK	133081	19495.8		HFQARNI	101573	8690.37
16	YCVK	34402.4	2039.08		IRASC	142589	33293.2		RWQFYI	133044	17593.9		MRCDAYK	99635.7	9710.71
17	TMRK	33757	13542.5		VDRKT	140291	39857.3		YCQRKA	131010	22658.6		YWLEKRM	99500	17622.3
18	TKRS	32829.7	10476.9		RAWKM	135013	19332.2		RPWYLN	130468	26410.2		VYKQRGM	99434.1	16931.5
19	WCYR	32752.7	8204.93		ARFHI	134963	26674.8		SKGYWR	130019	30594.7		KARFISG	99414	26619.9
20	PMWN	32165.1	4633.86		PYKTD	133860	21408.1		RPKNGM	127336	29048		HVTMFKY	99038	5899.13
21	CYWQ	31672.6	6516.96		AMTRQ	133644	19668.9		NKRAFL	124464	35681.1		PLWAIKN	96807.1	2664.31
22	PKWF	30691.2	11403.1		IGRAW	131610	43480.5		VWKLFY	119333	43234.7		FTWNISR	96240.5	14742.4
23	HTYN	30644.9	2841.56		RWFSK	131145	16538.4		WNKFQS	115923	39638.4		GFWRDKS	95524.6	8581.08
24	WRFA	30526.2	10185.6		WLKYI	130712	16444.8		FWHMKN	115804	12288.9		ATRLMIF	94360.8	30077.3
25	IKQV	29933.8	2147.49		IPMVR	130289	25933.9		GYNFKL	113780	18780.2		GWFSQHR	94109.6	15054.9
26	WYRS	29825.3	16965.1		PHWYQ	129204	6191.72		GFKSAR	112643	22279.3		RSIHWAM	94049.6	3088.42
27	WHIC	29798.6	3728.65		YVRAF	129114	21661.1		FCKWYT	112575	33829.5		KINRCQH	93516.5	18173.2
28	VYKC	29756.5	30825.5		WKSPR	128755	15736.8		LCMRVK	109800	22092.6		GCWTRPA	93476.8	16573.4
29	GNYQ	29520.6	2797.38		MLWRH	128271	27281.9		SAPIRK	108239	13897.7		WACVRTS	93093.8	12959.2
30	IAWR	29419.4	12618.3		HRIGN	127311	8546.86		ALWMKR	107964	27782.9		IWRNYQE	92470.8	11017.6
31	WSLK	29330.2	15918.9		WEVGR	126461	35889		QMWNYK	103143	29666.3		QAMRWNT	89520.2	18642.8
32	KGHT	28958.2	3306.69		QWIVR	125618	11382.5		YFRHIS	100868	8980.65		PSFWKQH	88999.3	6292.03
33	WYLD	28773.7	5797.13		DWRLQ	124834	15452.2		RLPNFW	100373	23680.1		YPHVRLF	88221.6	21763.9
34	PHFM	28688.2	3636.84		PQYKE	124059	37894.8		PTVRWI	100251	26997.8		VNAFLQK	88214.3	9275.86
35	YQKT	28676.9	10081.4		NMRHG	122769	34254.9		PKFSCA	99092.1	30832.8		KFVCRSA	87797.8	24800.5
36	CFYW	28336	291.725		QVARS	122094	9024.68		PKCMRS	98317.5	30388.8		RKHTWIQ	86735.3	28471.3
37	KSRP	28289.3	4916.33		RVSIC	121123	46721.7		TYKMGW	97388.7	10800		RWVLIKF	86623.5	23652.8
38	HAQY	28237	10365.3		EKRQV	120392	41966.4		PSKWNL	95485.8	5652.97		PFLTSYI	86397.2	9822.42
39	RHIV	28095	1226.35		MPCRF	119023	31283.9		RPMTKL	94108.6	39083.7		GQDISRK	85511.2	20526.2
40	DWYV	27730.9	1403.82		RFYQW	118932	13598.7		HMRFSV	92568.5	11324		VWRNYCA	85200.2	3587.66
41	AHFT	27705.9	280.155		LGCRK	118640	41220.2		FHNKQS	91989.4	13679.6		VSRIYDQ	85022.2	12583.3
42	SLKC	27686.6	7872.42		FVARC	117136	25678.9		NHQAKY	91562.1	18808.1		FWLHYKM	83506.1	9787.72
43	NRYF	27500.4	8705.18		NMRAF	116987	25014.4		VTSWKA	89575.4	824.791		ECKVRMI	82110.1	19619.7
44	VQLH	27496.1	6238.58		YIFVK	116095	13897.3		KWGVNI	87927.4	20356.4		IFSKQHY	82084.1	13692.8
45	SRPM	27441.6	657.09		RHICQ	114957	52143.4		IQVWKG	87869.9	15432		YIFRMVT	81720.3	10986
46	ITCR	27381.9	7080.43		RAIWY	114730	28337		YMWRIV	86346.2	9075.68		LQWKFMV	80009	10035.9
47	IQNK	27221.7	17123.1		QVKFW	114665	16491.9		PNGSRK	85121.1	2082.02		TLKFYPH	79785.7	29677.4
48	KYNC	27050.4	10094.9		YWKCG	114567	5085.32		IVQHRW	83547	5258.12		MTFGWKI	79470.2	10875.3
49	EDYR	27036.2	5295.33		AQRGC	113965	38480.5		SKHIVY	81100.7	21488.4		GKHQINW	79300.4	8697.5
50	RPFD	26951	5000.08		IPKTF	113729	27757.8		VYRHCP	79625.1	8067.43		RHINFWA	79236.8	7014.02
51	FLHM	26917	5990.58		PLVYF	112228	13398.1		ACPKFH	78581.9	24826.4		FLSNRHC	79079.7	31737.7
52	WLPQ	26636.6	1644.84		RPNHV	111864	30173.2		AVWIRM	77486.6	17258		GVCRDKL	78979.3	4211.68
53	YIVN	26413.7	5996.29		RVLWG	111365	7288.79		HIYQLR	76877.1	15172.1		PHKSWIT	77560.7	7064.33
54	NKYD	26206.9	1219.53		AWKTY	109728	32771.7		CKGYWL	76783	3564.55		HEKRGLQ	77433.6	10302.4
55	TWSN	26110.5	7596.67		KAITW	109383	8343.95		WYTHKF	76566.7	11016.8		TRVQHLF	76274.5	18536.3
56	RWLD	26087.4	5044.03		VMRAI	109311	31551.5		NWKGLA	76324.9	3108.53		PNAHQFK	76192.7	7800.96
57	YVRS	26021.6	79.635		TRFIC	108857	22381.2		GTYPWI	75348.3	8612.19		LQSRVFI	75984	15877.1
58	CFWN	25920	199.47		EFPWR	108837	22800.2		KLSIPG	75181.6	3483.5		RAHYDQW	75755.2	2699.11
59	IAVR	25744	10745.9		SVCFR	108778	33339.1		RPAFTY	74966.8	5819.78		TFRGKEN	75300.9	6707.16
60	NREL	25682.6	4199.16		MRGTK	108762	22904.3		FKPMWI	74900.4	9686.22		PSAQKHC	74918.3	21782.2
61	LPHV	25647.4	3995.3		PYTWA	108722	8110.45		VFRCIK	74207.3	20023		NFKTMVY	74500.3	11312
62	GERF	25610.9	461.35		FNKPG	108492	30601.4		INRFLW	73161.2	10803.7		ALWRCMS	73358.4	18394.8
63	YSFT	25465.2	5923.77		RWFYA	108114	34663		LMIWCK	73159.6	9562.07		AKLPISF	73012.2	3798.32
64	YDFE	25399.1	6313.67		WKITQ	107200	21702.2		QIVHRG	72001.2	7198.25		EWFYKPD	72347.3	14012.2
65	HYPL	25341.9	1688.97		PRWDN	106522	16644.9		VYKNTS	71073.5	17767.4		RMSDYKT	72065.5	5791.96
66	HSRK	25198.3	8624.59		NTARY	106296	27785.2		HFWLQI	69563.6	7510.44		RCQKGWE	72060.2	13358.6
67	KLMR	25183.6	764.065		KLHAF	105473	50093.3		SMRYNG	69442.2	12373		RFVSLIM	71964.9	28223.2
68	VKWT	25048	9063		IGSYR	104811	14877.6		TQVHKI	69252.8	5090.93		RIMHKAE	71959.3	27452.8
69	NFKL	25013.8	4577.88		GMNKC	104707	2826.24		NKQWPH	68352.7	5965.44		KTRWFSG	71813.7	15975.2
70	MFNV	25005	2413.17		KHYVI	104687	15053.6		YKAGMT	67148.8	15392.3		KDMQRTL	71546.7	19012.3
71	KSTW	24964.5	7711.39		YNKST	104646	8763.84		VTYKHE	66592	11437.2		QHYNRDG	70885.2	15117.8
72	TYKC	24956.2	2865.17		VKYFE	103542	10186.4		QTFPWV	65966.8	12236.4		WETGIFR	70223.2	19235
73	VYRW	24692.8	1512		MNRGA	103448	17857.3		YCWMRQ	65789	5773.33		AIFKPQE	69314.6	11209.2
74	VHMK	24662.9	3853.44		SMKFA	103379	25256.5		ITRYVQ	65118.1	13567.1		PQFDVRA	68927.3	23334.7
75	YWEL	24643.7	686.255		KHFWQ	102487	4533.42		GSQFLI	64681	9747.14		WPQRNGF	67608.7	13694.3
76	FWTA	24608.5	285.17		DQWTR	102237	15506		HTQKCF	64281	16488		HRELPIY	67273.3	3864.47
77	AICH	24483.6	7225.31		PVWFK	102104	8420.67		LRGVQA	62762.7	13756.7		VFSRLTM	66520.2	13982.5
78	YNLK	24470.2	643.3		PIHLY	101938	17041.6		TWFSYR	62659	16011.8		YDAFTWR	66418.2	9805.84
79	KGLQ	24442.2	10726.8		QMNTR	100652	20678.3		TWRMYS	62654.3	16895.4		AKVQYLD	66280.6	7137.27
80	HYVK	24413.8	5758.78		IMHYR	100272	19623.4		WTICKF	62115.8	21310.4		STFHRAN	66110.9	14674.3
81	CWKD	24361.3	5107.33		LRSNW	100099	14722.1		HGLYAV	62109.7	10735.4		DKLRSPT	65854.6	8167.93
82	MNYA	24356.4	5532.54		FKSPL	99447.6	10015.6		IACKVR	61725.4	16188.3		SMVRPLW	65398.7	11378.2
83	HIPQ	24356.2	1052.64		KRHPY	98246.8	10757.9		TLAIRF	61472.1	14336.9		KQLVHMD	65222.9	13052
84	YPFI	24161.1	3251.74		WTQHN	98160.1	24460		FQNGRW	60804.3	13183.6		RYCMLHE	65174.1	13595.4
85	QRHK	24125.1	17863.9		WLHSK	96399.2	10836.3		RTLCVF	60566	4914.48		KWYEPTG	65072.1	13345.4
86	PWMI	24054.4	6769.58		KTMPY	95903.5	10375.4		LRQYWE	60314.6	2494.73		YGKSFRP	64495.9	18334.1
87	ERSF	24040.3	3291.6		MWKDF	95537.4	13901.9		FYIVTA	59621.3	9061.82		WQREPHG	64316	15477.6
88	AWGK	23923.7	2257.69		FMHWP	95186.3	24296.3		KTGAYC	58661.1	9208.36		HLWRYPC	64221.7	16344.3
89	HLWY	23915.1	7680.06		HWRPD	93920.3	3050.88		GCANVK	57943.1	6904.55		FQETWRI	64052.4	7217.21
90	FWPR	23863.6	9957.82		PWAIV	93631.8	10439.6		IKGTMR	57688	19942.6		KWTHLPR	63997.5	12301.7
91	LCWS	23813	2701.74		YRDIL	93003.8	17398.5		FGWVQM	57341.6	6934.42		FRSAPHD	63463.5	18720.7
92	KNMW	23712.7	729.94		NMKWD	92923.7	25793.2		IFERHW	57210.7	6372.06		PQFWVMY	63458.7	8101.63
93	CVKT	23655.4	14286.8		EHSYR	92866.3	14218.9		CVKRML	56772.9	18070.2		RIQVTFK	63205.2	11026.9
94	YNEW	23562.3	2390.85		YCKIL	92142.5	17110.6		LQSMKA	56578.4	13997.3		RDLHTQY	63166	8905.64
95	YTGW	23543.4	301.005		EWFTK	91911.6	20620		IAWSQL	56483.7	9693.94		RVPNEKH	63058.3	6825.83
96	VLYF	23472.5	1005.26		LAMRK	91896.8	43512.2		WLHIFN	56469.1	9098.62		DNSPRFC	63002.2	8416.2
97	YMAH	23387	1969.65		HMRQG	91746.4	25822.2		RWDYIT	56391.7	14764.5		QLSRTPN	62970.2	15169.2
98	DKNF	23383.5	4788.36		DHWRT	91548.4	15186.4		SYKTLW	56209.3	4505.84		WFPKIAD	62536.6	2090.07
99	RLMN	23295.2	19915.2		GKNSI	91467.9	11538.2		HQSWNY	55884	18240.1		LYIVATF	62283.2	14633.8
100	IMNL	23232	2232.03		RWEYI	91078	4158.91		PKTAMQ	55256.4	18368.9		YALIVGK	62174.9	6259.63
101	VKWG	23210.5	5897.3		KSWLY	90626.4	17026.4		PMTCVK	55087.8	13779.3		GHYQTVF	62170.8	8231.26
102	KPCW	23207.5	5725.03		WTFNP	90573.8	17593.5		AMFWQY	55011.4	22572.2		PAHQFRC	62105.5	10080.9
103	VYSF	23198.8	895.265		LEKHY	89964.8	23702.4		VQRAYS	54252.5	9651.04		TFHSREG	61739.1	9310.15
104	AWQV	23119.5	2312.53		LPFMQ	89773.5	6299.59		KIYELM	53702.8	11542		PCINFQL	61672.1	8245.6
105	TYFK	23113.8	6079.4		LQMKF	89720.3	11393		DYAMKW	53565.9	3042.53		LWHCPMK	61023.5	7125.06
106	CWMF	23110.5	9116.9		MLKQW	89592.5	3912.25		YEGRWL	53479.9	8384.79		ILDTRNW	60954.5	11241
107	CHTR	22842.2	3293.77		AKSFE	89525.6	3458.04		NSFLRY	53179.5	7899.22		KSWQPVH	60805.6	6887.45
108	TVKH	22723.3	3735.99		QRHTS	89370.3	21774.5		VDQRIW	53048.8	4358.19		HYCKEML	60577.4	11990.6
109	SFYI	22629.1	1278.99		WLCNR	89281.4	14807.1		DKLPWS	52586	12380.2		KLGNPRV	60283.4	4771.37
110	IANR	22621.5	4565.4		RLYFV	88985.8	12898.5		VFTLAR	52453.3	13359.4		ISPFWKE	60214.4	13985.8
111	AFKC	22590.8	3272.7		FLRCW	87959.1	17816.8		MYAWVL	51771.3	12058.2		PGVYTSF	60013.6	20852.3
112	SVHF	22580.3	6456.36		WYSVQ	87908.6	10392.3		SKYLRP	51518.8	14536.2		FRQIPAL	60000.3	7539.45
113	SPQN	22560.7	1348.47		RTMIP	87648.7	22429.8		NRHFLG	51274.3	3167.03		ARYLQPC	59911	22713.2
114	GSHP	22531.9	3917.71		NPFCR	87236.9	12479.9		MGFRTN	51188.3	4356.15		VSIQRNC	59642.8	19163.2
115	KDWR	22436	3145.93		FMYVG	87227.9	27191.6		GYMIQH	50470.7	6904.61		IKVLEWG	59410.9	10098.2
116	AHYV	22424.6	3629.5		GVYPL	86764.5	20474.2		VISGHY	50358.9	3779.79		IQPCYLW	59072	8252.02
117	ATHQ	22417.5	2058.97		LYKTV	86587.3	12332.9		CAVSRY	50095.4	1573.72		FYGEPKQ	58881.8	12753
118	HMPW	22358.2	6772.3		HSNTK	85383	16623.8		TPYHFL	49736.3	1996.3		SYDRHFV	58870.6	17181.6
119	YRNT	22314.3	461.56		PAEVR	85159.3	23086.7		KVMAPQ	49702.2	14566.4		QHMLPFY	58657.3	5703.35
120	HWIQ	22312.6	179.87		AYHNW	85134.9	1961.98		YHKAVD	49380	12287.9		TCIVPKY	58553	19534
121	KQSP	22292.3	9512.12		FYRGH	84892.5	31506		CGIARW	48470.9	7657.85		LKEFQIG	58489.2	8867.76
122	MHYQ	22192.5	811.14		SKIAW	84370.1	13604.8		LMFAHS	48456.5	8354.31		FQCKLEI	58478.7	5663.85
123	HNLY	22164.8	2546.42		CSWVR	84089.4	12281.2		QTVKIG	48105	3927.51		NRLKWIG	57997.2	4234.27
124	NIKG	22074.9	2422.37		TFKYS	84011.7	13888.3		VFILNT	48041.7	12082.8		SQFRWPL	57768	17528.5
125	LENR	22058.9	3658.2		NRWDQ	83922.7	11147.6		FGERYQ	47953.2	7270.36		CYRVWPT	57715.7	16226.6
126	DFMW	21970.2	4400.72		NIVKG	83717	19288.6		LKFVEC	47705.9	7588.1		CDFKGRY	57292.2	20222.5
127	QTWK	21912.1	5287.6		KYWSQ	83428	5072.13		VGFCIK	47631	13637.9		YGVLAMR	56503.4	16740
128	NGDA	21900.8	3258.03		PWGCD	82996.8	14146.5		KHPNSR	47308.2	5980.27		QWEHVYK	56430.9	19557
129	QKIP	21719.3	6874.13		PGDRF	82759.2	7197.01		RMNLDK	47226.1	9569.38		YSCKPLQ	55986.2	6217.46
130	SMFG	21718.2	1379.36		LYHGF	82550.9	13029.9		TFWPIY	47140.3	6935.76		LRVSNMQ	55008.6	11294.2
131	MFWS	21711.4	971.275		WAMHG	82167.5	26705.4		WTQFVM	46922.2	8046.58		NAFPYHW	54942.3	9671.78
132	DWRI	21646.2	4631.77		GTRNQ	81267.6	19788.5		PFYTVE	46876	10036.5		WYTNKHP	54572	13424.6
133	CIRN	21635.8	4118.15		YGSWV	80605.7	7050.44		HMSITW	46806.7	19271.9		YQAMFWL	54368.7	6704.8
134	ATQR	21617.4	6327.73		LSHFW	80405.6	10733.3		ALDFYN	46709.6	7187.27		KWQNGYI	54175.9	4118.25
135	IGFQ	21569.6	884.93		KSYIN	80063.4	10567.3		DSPKNW	46375.9	4857.1		FCREIVH	53977.7	14239.7
136	KVNS	21560	2122.88		WYSGF	79818.6	7416.97		DNYVFQ	45688.4	8105.61		TMAWILY	53786.3	8902.03
137	MFIW	21534.9	3259.12		FHRIE	79796.4	12292.9		FYAQMV	45130.1	8764.25		IWRPGDV	53264.4	6641.6
138	IQPK	21472.2	4619.62		LNAWF	79693.5	13566.6		GWQMSL	45032.3	11840.7		CRWQMIT	52892.3	5634.65
139	PVMT	21459	2904.1		WNHIP	79361.8	9514.86		VGYLAR	44513.5	3912.44		MNQKEVR	52852.3	17410.6
140	LYNF	21383.9	1142.86		WQIVH	79351.6	12408.5		WSQFTY	44384.6	8543.39		NFTYWHA	52845	8065.68
141	KHQG	21303.2	1938.15		YNCRP	79186.6	8074.06		SPQRTH	44248.1	8396.25		RNQTSDW	52771	6664.1
142	YITM	21273.3	5372.52		SQRYG	78914.7	6794.74		RCIQMP	44083	13636.4		FIYCPSN	52760.4	9661.11
143	RKEW	21143	7074.33		YLHNM	78236.3	19145.5		VGWFHE	43417.7	17912.7		RMFCYGD	52615.2	17303.9
144	CRPG	21128.8	5799.38		GAIYH	77939.7	10863.7		FARVQI	43108.5	2207.63		PGRATEL	52563.9	8980.29
145	MEWY	21085	3103.07		VWLHM	77626.8	8696.36		HIFSVP	43105.7	5050.86		SVILPFY	51984.6	19669.7
146	MQSH	21079.8	3584.1		HCWVY	77325.8	7258.88		SKVQAG	42980.9	5468.12		HFMCYSW	51944.1	7114.19
147	AKYT	20979.4	2027.33		LDKVY	76888.1	2974.59		WQTYSP	42959.5	5301.55		MLIYSAN	51726.7	5941.97
148	AIPF	20940.4	490.335		LAWVP	76876.9	6682.75		DYKLGM	42947.3	9380.72		LKSGPMQ	51425.4	5583.43
149	LMYP	20850.5	3272.5		AMHRV	76518.3	3075.32		DQYAIF	42627.3	6206.51		WAELRVT	51401.8	8843.53
150	CTRI	20842.1	1439.09		MHQYW	76473.5	6944.4		RNWPCV	42570.1	9951.31		VAWQIDR	51384	1395.53
151	KMQW	20817.2	6425.56		AQYVW	75894.4	10337.9		CSWHFV	42535.2	2155.25		LWNPMQY	51052.3	7082.9
152	GFQS	20795.8	2219.22		FGKAI	75603.2	8777.07		SHRCAY	42354.6	3984.38		HIWFMLN	50563.7	11045.4
153	LPTH	20792.9	1833.3		FRQGN	75333.9	19565.9		YKELQH	42178.6	1071.98		DAWCPSF	50508.5	19512.7
154	WRIL	20779.5	5145.23		YKPTC	75220.2	29616		AYFELP	42155.1	9762.59		FYCNLHA	50324.4	8723.46
155	AWLI	20777.4	786.765		RMGWV	74797.5	13384		GPHRTV	42068.7	6136.6		QFKMSVP	49705.9	5850.14
156	HMYA	20735	5777.69		RSVLP	74778	21493		LFEKCG	41984.1	7030.29		NHWCMKT	49511.4	10303.1
157	IREF	20608.1	2338.71		ISQKE	74748.7	4649.78		RWPGCH	41957	3044.07		VSYHICP	49373	6179.54
158	GLNI	20586.4	3676.68		YFRSV	74484	7092.2		IRPCFV	41822.6	4625.09		VDMNRIL	49256	6440.2
159	LFIW	20540.4	6279.69		KVFEI	74357.9	14859.6		YHIWVD	41560.8	14766.4		LQHIVGT	49189	1836.82
160	VDYR	20422.6	4015.78		ARSVP	74159.2	16962.1		EKRLNC	41458	8404.74		LQKMSPC	49027.9	11194.4
161	RNLY	20349.2	6511.66		AIRTC	74035.2	24157.1		LVCIPF	41330.1	13255.2		SRPCHYA	48928.5	32049.3
162	TWLC	20282.2	4898.38		WGQAV	73817.2	3439.22		KSPIQC	41165	16171.5		MIPAFVC	48876.7	6443.09
163	PRCI	20276.1	38395.3		RFQSG	73143	21580.6		SPNMHT	41054.9	13090.4		YKNSVID	48801.4	5742.05
164	LYCM	20238.5	5272.96		VMTKY	73136.1	9321.93		GAFKRE	41024.6	12125.9		VWYDHMI	48404.2	10402.9
165	YSNG	20167.3	2743.86		RFSIG	73090.8	25200.5		FVCWAN	40875.1	8159		QEHAIFR	48363.6	10839.1
166	KSGC	20152.2	362.075		FNHVW	72967.5	4909.14		WQTYCG	40810.9	7668.01		GWYQMLE	48207.9	3395.39
167	IMLF	20134.6	2607.41		NGIPW	72425.5	1289.39		PGYVIE	40676.1	7139.49		PKDVTQH	47569.4	19122.6
168	EQKP	20044.5	2010.12		GAWCN	72383.6	15018.8		YDMWHQ	40620.3	4962.26		DQRVSYM	47264.2	9588.91
169	FHGW	20042.9	1384.63		RPVTI	72266.4	16772		GEFYNT	40605.4	1791.99		PMTIVGL	47202.9	13493.1
170	TMSW	19974.1	3629.84		VGLKD	72240	18066.8		WGMTLQ	40431.1	11641.2		DVHWKMS	46826	11908.8
171	NMVP	19853.4	560.455		QAGKL	72123.1	4158.33		SCYKVM	40380.1	12277.7		WMGFYVC	46814.5	13006.5
172	QKMI	19721.4	2938.46		RKISG	71920.6	24097.1		FHGEKI	40180.5	15606.1		GKHWQVL	46757.8	15121.4
173	WHMS	19649.1	402.505		DKICR	71868.9	17836.9		LNGRYQ	40142.3	5546.29		PSKQAWN	46751.6	3499.77
174	ICWH	19578	6004.2		SHNRC	71753.1	6019.9		SLNAKV	40040.2	8206.48		VMRSECK	46293.2	11056.9
175	FHAP	19487.6	3836.01		FVNWT	70986.5	15316.5		HTYKSE	39820.3	7278.13		EWKANHP	46292.7	4116.4
176	ICSP	19433.1	6843.03		WCYST	70778.7	13128.1		NVAKSM	39806.4	5121.06		DRHIQTS	46008.4	7869.51
177	FWNI	19379.4	3415.11		LVAQW	70647.8	19161.4		ALRTNS	39791	9361.03		QDHLTWR	45908.1	9321.54
178	FSGY	19378.4	2755.47		NCDWR	70587.9	19075.5		NKSDWA	39734.8	7693.35		GKHCFAY	45570.9	7948.54
179	VAFQ	19299.2	2125.08		RWSTD	70454	3280.92		NKCTGP	39693.9	5244.32		VNQAFTG	45249.4	14667.5
180	NYAL	19283.4	3407.78		SNIGK	70402.7	12835.9		QYETLW	39302.1	16651		RPQNIGS	45111.5	4353.35
181	DWTF	19223.7	1332.74		QLYIM	70031	8157.54		TFWHQE	39301.7	10718.8		VWFIPDM	45048.7	7886.92
182	SETK	19192.3	5394.81		AQGIK	69975.2	14556.8		SDPFVQ	39092.9	8955.23		EIHWYSA	44865.1	4999.13
183	RANP	19180	1738.67		VCIKP	69942.6	2396.48		MAIVRY	39041.4	4424.83		IMGQPFA	44781.1	12465.3
184	PSHI	19115.2	4809.52		TLWHP	69933.4	10950.5		IMLDAW	38885.6	7587.42		IWTDHPF	44739.9	10213.2
185	HINM	18851.4	5948.69		GDKWI	69568.9	12581.2		FGVYNE	38480.4	10310.6		ESLKWVT	44719.2	4795.05
186	LEHG	18843	2195.67		HLTFG	69386.4	9905.78		KTNVQD	38061.6	10271.6		NLREGCQ	44655.3	6280.5
187	HITF	18696.6	786.105		HSQVY	69033.2	3696.45		SYATFE	37649.9	9565.02		NVHYGME	44270	10186.4
188	MVPC	18695.6	1178.26		RQYSD	68928.6	16011.1		KCSQVW	37456	6990.86		AMTWLIQ	44257.4	5983.61
189	RPIV	18658.6	2231.99		FRTCD	68283.1	12344.8		DYEWNQ	37238.7	5016.68		FEVYHAN	44188.2	7472.99
190	LDHQ	18591.3	3284.46		GNKAI	68084.4	5312.99		MTNQHF	37109.7	7353.93		EHYARDI	44176	6661.13
191	IRSA	18518.6	2447.75		LWCHT	67988.7	15121.8		KYIQCE	37016.4	2150.49		MSQTLFY	43975.2	5448.61
192	HRKG	18509.8	576.975		PGYWD	67710.9	10654		LYIFNP	36890.4	11321.7		DWKFNCG	43917.1	13114.7
193	FLKD	18466.4	668.74		CRHNT	66725.3	15441		YTPKFE	36825.6	7969.33		WRYSMNG	43773.4	7728.69
194	QKAM	18449.2	6152.57		DWRCS	66675.5	6757.16		DPRAMF	36694.6	2451.85		QDAHNSR	43673.6	8601.56
195	PAGW	18356.3	4162.14		FNEKY	66647	6235.53		TDILSW	36691.5	9541.25		WCNKVET	43554.9	3779.78
196	GRHA	18340.5	17336.6		YSTLW	66550.9	10924.3		EKCIGF	36622.3	13935.1		WQFIYCE	43298.2	5002.58
197	TGHR	18319.5	10639.6		VPDRY	66257.2	15431.6		CHIWTY	36534.8	3321.66		SRQTWCD	43170.1	11378.2
198	VEQF	18226.5	1668.81		GVFAQ	66206.6	7849.56		SVLAWM	36097.1	957.721		LIVAPQH	43144.6	19942.3
199	ETRC	18220.6	10.045		GKRTH	66041	47896.7		FHRLEI	35782.7	2133.25		KEHTFPQ	42905.4	8851.19
200	CQLI	18211.1	4882.08		GLHFP	65905.2	10070.3		DSCARY	35645.6	6866.39		DMRHGNV	42892.4	9840.37
201	LESK	18156.4	8235.05		RFHPQ	65422.3	35643.5		TGICFA	35593	2989.47		GFWDTIY	42691.4	3341.23
202	ELKN	18113.7	3003.48		IEHNR	65155.5	8281.71		PTYSQA	35496.1	5585.84		MDFPYNW	42629.7	6525.39
203	SPCH	18113.4	6589.4		YGTLV	65081.4	7088.4		FQRDKN	35431.9	10949.5		MTLNFQS	42598.9	5004.1
204	MQKL	18041.5	532.715		GHIYT	64736.7	9429.06		KQDHPL	35319	8738.23		GQDKRTC	42295.9	22998.7
205	MLHQ	18009.5	1856.26		PVYEQ	63888.4	7387.56		DTQWVK	35312.7	5320.13		NMCPYVI	42144.1	14947.4
206	WGTS	17930.7	7032.81		STKHL	63082.1	8996.86		RDTFYS	35278.1	12288.2		DQGVMPR	42099	10840.8
207	LMNV	17882.3	2561.67		SYQWL	63058.8	8365.74		HYEPIQ	35230.5	10513.2		MQRSEFV	42080.7	6518.26
208	NPVY	17877.4	3086.74		IYANV	62631.8	2810.5		DRIWKE	35156.9	7108.19		FPGMVWS	42045.7	10498.9
209	WEFM	17842.1	575.84		HPTFM	62539.3	2936		SYAVDH	35131.7	4382.9		QRYIEMC	41982.8	550.318
210	ALGH	17835.3	1373.87		WDLKI	62385	9136.36		WFCGIA	35107	3383.56		WVGEIHN	41980.2	6485.2
211	IFPK	17819.6	2734.06		LAVFP	62026.7	7676.74		DWLIHT	35059.7	9121.22		GTYWSAD	41836.5	10083.2
212	YMEQ	17656.5	4130.89		ESCPR	61939.1	26833.2		SPNMWT	34850.2	5182.84		CGQRAMH	41582.5	13974.3
213	HDKI	17653.7	3236.23		PVIGQ	61626.4	6525.56		WQAGSR	34710.9	13689.3		GAMTKQN	41147.9	11764.9
214	DSIK	17621.3	897.87		LGIQW	61467.2	2686.42		SFLIPM	34648.9	4380.17		CWHSPNK	41091.4	4172.38
215	PNAS	17541.1	402.83		REPKT	61249.5	6665.91		AHSYER	34597.9	7974.31		YSHEIWL	41047.1	6931.72
216	RETN	17519	2011.12		GAWND	61248.4	12340.8		VGYLNC	34497.1	4378.73		QEHFVWL	40991.2	4223.23
217	DIGR	17459.5	6250.4		KMVQI	60935.9	4101.43		TVIMPY	34454.9	6057.26		LMHPYQG	40824.5	11827.8
218	RNDT	17415.8	1767.07		FQSMW	60907.6	9051.88		EIRPSK	34436.6	1389.61		NGEQKSY	40793.7	1225.31
219	VIYE	17394	6735.87		WTLSM	60663.4	3929.49		GQFRPY	34414	4660.23		EPGTVRM	40706.9	13403.8
220	PKNM	17379.9	2978.38		FEWQT	60637.2	12593		QPNRSH	34174.7	10170.1		WGLSCDM	40667.5	7830.68
221	ERDY	17377.5	7490.49		DNKWA	60452.6	3920.01		YPWSDN	34165.5	6732.08		FIYECDP	40618.4	14221.2
222	WMTG	17331	546.85		RLKTP	60387.6	32573.3		NAYCLH	34139.3	7229.22		FLIEHQC	40616.5	5332.96
223	LGNP	17303.7	817.445		DPNKH	60335.4	4101.96		KPSDRM	34076.1	4681.23		MVPRDSF	40538	12146.2
224	AHLD	17260.2	1892.74		VLWMD	60150.2	6004.38		GDFEQH	34064.9	8505.11		SNPTIYG	40287.5	7246.14
225	CIYW	17219.4	653.975		CHFTK	60121.4	22308		IMCYTA	34013.8	14896		PDWNLIG	40266.3	2883.44
226	HLTY	17182.9	2822.92		HIWEA	59522.2	6036.27		FPMCVL	33828	6368.47		RHSVTKP	39851.5	3182.43
227	MGTR	17099.3	11438.8		YCAWG	59256	3084.92		EPYQCR	33395.2	1868.97		KVEPFWT	39844.4	12768.2
228	IPQY	17088.1	167.395		SGWQT	59097.9	5990.55		DIEYFN	33295.5	3098.71		NAWLYEC	39816.6	6397.65
229	LIKA	17000.9	22806.6		WMTVG	59067.4	8524.82		DGFSYE	33166.9	5259.6		WTLQVFE	39640.3	8728.76
230	GPMF	16964	5912.43		SHQNK	59062.4	10467.3		QRMVIN	33061.9	6168.2		QKNCFGI	39544.8	14572.9
231	EDVY	16927	3790.93		PYVEF	58888.5	9497.07		NFPTRL	32856.9	13284		ERHSMGL	39513.4	3461.6
232	RWYP	16895	3503.64		WAIFL	58850.3	7707.76		HMRWSE	32764.9	12147.7		EDQSWYK	39399.5	16489.7
233	TWNY	16832.8	754.78		VTFQN	58320.5	12348.4		TIKEAS	32728.7	8338.28		ANRGPIL	39348.9	12106.7
234	PQIL	16829.7	193.2		NIPYS	58262.9	11213.3		PITRQN	32562.9	8640.24		LFWCAGP	39340.7	9038.21
235	TILA	16818.6	3982.9		VGLMF	57997.3	10102.6		GAVHTC	32099.5	3453.07		GWEAKDF	39276.6	13147.1
236	LPST	16788	516.665		GPYNT	57889.7	3730.33		WHPLQD	32086.9	4901.17		LFWVEMS	39255.5	5823.78
237	CWHT	16782.4	5451.4		HYTVI	57634.6	11661.3		IAPCVR	31983.8	6341.42		KNLQDIF	39215.3	17227.4
238	TCNF	16676.5	2402.54		KFETY	57462.8	9410.81		QEDSGW	31968	11686.1		VKPENGF	39208.2	9894.76
239	GRMS	16592.4	813.415		MGLFY	57433.6	5389.52		ILCDHV	31965.8	5453.13		MHVGFLN	39206.2	11910.4
240	MLDW	16516.2	888.29		KAPSQ	57360	7305.59		EKIAQH	31932.8	7140.09		FCLIVAH	39178.6	17079.7
241	YCEK	16499.3	3053.17		NASPF	57127.1	2300.22		DFWYIC	31928	11759.8		MNQLSKP	39013.9	4646.7
242	LICF	16492	1246.69		LGASY	57044.1	8152.7		ILFPMA	31923.5	10377.5		LKMEWAT	38966	7505.72
243	NCLR	16437.1	2479.64		NTLSQ	56803.6	11357		MCIYPA	31793.4	2217.93		YPAHDGQ	38952.4	5902.48
244	GLQY	16430.6	2383.91		RNGAS	56500.4	19252.9		RSFEPH	31705.8	9512.04		RSTDNLA	38915.2	7421.1
245	TERL	16385.2	6343.18		TLWSP	56472.6	8055.25		KNHRDM	31673.4	9108.77		GWPLEKS	38843.5	11488.5
246	PFEY	16355.3	53.185		RMCPL	56456.1	7359.68		PGSFNH	31555.5	12534.3		GWKMDLH	38798.1	6194.39
247	THWL	16222	3989.27		NQWEL	56395.4	7733.86		YCEDRK	31492.8	6274.65		LQCAMVF	38777.4	1214.31
248	NVDE	16145.8	2012.35		PNIQS	56176.7	2275.3		WNPVYQ	31358.9	198.91		GQSIDFR	38517.2	8263.77
249	ARQL	16138.9	2939.94		TRKYG	55820.3	15745.3		TNDSRI	31341.2	7931.25		IFQDEAK	38395.6	10265.7
250	DYPC	16082.5	695.265		KGAFD	55541.1	7586.35		EINAHV	31306.4	9949.01		DNGHTLK	38254.3	7230.47
251	PQMH	16011.5	6745.43		DWLGK	55348.1	4450.05		NFSEWT	31246.3	19254.7		PICHVND	38083.8	9378.37
252	QMLI	15956.8	197.57		SKVTQ	55231.2	16247.1		EYDPQW	31237.2	10131.2		THNESRL	37815.3	16690.2
253	NEIS	15938	347.15		AHLFC	55062.2	11802.6		AIDGWL	31226.2	10190.7		FNERTCV	37754.1	3646.72
254	IDYC	15936.7	4001.03		TRDHY	55059.2	7126.35		YCHDSA	31146.2	12029.9		QSFATPG	37673.8	5059.54
255	MDRT	15912.9	4768.53		TIVFQ	54297.8	1913.38		VDSYHK	31145	5077.5		EFQMAWY	37419.6	6672.28
256	MNTH	15903	746.015		WAYTC	54071.3	4126.69		FPTVCW	30940.4	11926		YIERDFS	37342.2	3288.08
257	GSPR	15849.5	15849.5		LFYIE	54055.5	3673.9		AVWNED	30833.9	8314.83		SHFDTYG	37240.7	6398.82
258	NWQT	15843.7	341.175		GQNAF	53984.1	1098.87		NQECHL	30811.6	11061.8		SLGATRE	37097.3	6501.79
259	HDRI	15831.4	5230.38		NTPQH	53620.9	4463.77		PNMGIR	30747	15123.7		TGKLEQY	36967.6	8218.67
260	VYEH	15757.7	4505.22		EAVYF	52687.9	5763.04		IFGEPH	30597.7	3994.31		WNLHAPC	36637.9	6314.13
261	FQCN	15706.9	1382.57		FMSNL	52281.3	1815.31		LGQFSC	30489.4	9661.28		SKIGPMF	36503.3	2618.94
262	PQCL	15628.4	1405.44		EWHNI	51676.4	10878.4		ETSDNY	30413.9	14372.2		RFPQHDI	36407.3	31192.8
263	CTML	15550.1	3903.51		RMSDL	51503.3	6061.5		AMTSKQ	30240.1	16454.4		CPGRHND	36400.9	12034.6
264	LGDH	15462.6	624.6		THNYP	50895.5	13082		CWDYRM	30216.1	5202.73		QMFVGTI	36336.8	10743
265	QMCW	15365.7	1568.01		WFGED	50846.6	4887.81		VEPFCW	30169.2	7689.75		SKGLAVT	36255.4	11400.9
266	DMNH	15365.6	1801.43		HEQIW	50618.5	8517.32		QMFTCV	30139.8	2982.16		VKSDMHQ	36038.2	6833.73
267	SIEF	15230.2	689.195		GAVIL	50311.6	2230.68		EPYIRM	29983.4	10030.5		RTGDCWI	35961.6	7109.99
268	VYGI	15226.9	5685.68		IAMVL	49844.1	10383.7		LFCNIH	29789.3	13629.6		ELSYPCI	35951.8	4327.97
269	AGFC	15197.3	3394.7		GKAEL	49788.8	3854.78		CIEFVP	29483.7	5286.1		VAGWCQK	35701.2	5783.1
270	NSQA	15162.7	759.25		SDVRI	49749.2	6259.39		ECFIAN	29441.2	9845.45		LYHCMEI	35605.6	2009.85
271	SGAI	15127.4	1143.96		HLYEM	49608.4	1750.03		THCNQW	29379.6	5540.21		SNWGMQA	35230.9	15507.6
272	YMAD	15127	1647.98		VYGDP	48843.1	8054.56		QLEKFS	29340.2	11143.6		HGCFTWP	35078.7	1931.16
273	PNQT	15126.5	124.155		AYSMP	48832.6	10515.9		IHWMQD	29100.9	6246.86		TLQNDFW	35000.4	15972.3
274	NMVS	15085.3	1138.89		PNVST	48048.1	10830.8		EHCIFS	29053.6	9636.59		ELNYTQP	34958.3	2413.8
275	QAFP	15077.5	4307.91		GMVCF	47592.2	5355.22		QDTSWY	29052.7	3428.79		AITMQFN	34771.6	11247.8
276	FHCE	15064.6	5105.55		MDCWY	47477.9	6427.45		YWNEGS	28897	6801.34		KRMPVWF	34664	12364.2
277	AHKP	15020.9	1191.57		KLDNP	47465.3	6679.65		QFSDRV	28874	8848.79		QCKWEYF	34638.6	13693.2
278	CWND	14963.8	2524.13		HDFVQ	47218	2962.43		VGHTYM	28834.6	2132.6		HTMERIN	34491.2	13314.2
279	CVFI	14916.7	180.96		QESRI	46791.5	5874.16		SFNQDT	28785.3	8752.73		SDIYGHA	34486	2786.62
280	RPNE	14902.2	7293.98		NLWMD	46760	9431.65		YLVEGW	28660.6	11084		DVKSNIQ	34443.6	10151
281	ERPT	14889.9	3466.38		EYKCQ	46559.4	7256.22		HWNGDL	28656.7	5250.93		FVADPNL	34414.5	4927.56
282	TYQP	14711.1	1788.48		FYPSE	46421	9970.78		QSFTCH	28577	11433.7		EIRMQHC	34143.1	18278
283	RATN	14682.7	3190.79		PMASL	46233.4	5658.83		QCYPAV	28550	5993.12		FMQATLG	34040.6	3178.58
284	SMYT	14678.3	2455.83		QGYCP	45508.3	12196.9		PHGFER	28504.2	4680.07		IWMEASL	33931.7	11379.5
285	STAE	14652.1	5518.81		EIMRV	45277.1	6546.81		HRQTMN	28223.4	11481.5		WNLDVAY	33816.9	14704.9
286	GYRS	14620.4	40027.4		SYDFP	45035.7	5561.85		TFQRAG	28102.9	7150.62		EPDIANK	33684.3	11364.4
287	WMEG	14591.7	1123.06		TSGYH	44969.2	10463.5		HTGYVD	27842.2	3996.41		CDPNHRW	33544.3	13553.1
288	FEDI	14570.6	2880.53		HTGIL	44884	9180.2		RADGYT	27429.5	8893.96		AYLGPMT	33434.7	11817.7
289	ELCW	14561.4	894.155		MSYIA	44849	764.769		IQYFEW	27332.2	8465.19		TVASYLG	33350.5	4540.93
290	INLA	14544.8	2154.61		IHMPN	44773.1	3486.18		DNRTAP	27267.9	4295.51		SCPLFKR	33072	19685.3
291	GWQC	14473.5	5436.03		EGWTI	44414.3	10681.3		WQICDV	27200.8	6230.67		KDHYIWC	32878.2	13600.1
292	REML	14472.8	310.48		EHMWL	44354.4	4378.51		YWRPLN	27022	3532.93		CILNMKF	32718.4	10706.9
293	RDIP	14430.6	37.775		FAQEV	44333.3	5954.15		HWSCRE	26957.1	2615.4		DIERSTW	32655.2	14259.3
294	ELAV	14355.4	2269.9		NFTYE	43797.8	16222.4		CYEWFD	26896.2	2601.23		IMWAGND	32650.8	8046.32
295	NCMW	14338.5	309.09		VIGEK	43699.1	8154.89		SYLMPT	26864.5	6561.1		TFNAIML	32625.1	6370.55
296	YVQD	14319.3	1949.35		SACKN	43674.9	12689.1		QYNMIA	26767.9	3324.93		DICFNYA	32584.6	4832.44
297	INCS	14246.1	2688.57		DSNGW	43334.2	5308.28		WHTGEL	26751.3	12881		EVQAIKS	32121.5	13394.3
298	SIGM	14243.4	913.445		EFSVP	43212.7	9087.26		LMANPV	26650.7	6394.88		GPNLHDS	32082.6	7522.53
299	MLYG	14150.3	3320.08		PNDIY	42873	3679.49		QEKFIC	26577.7	6919.56		YCELIAP	31827.4	9908.46
300	EGQP	14066.1	6.755		FMDVH	42802.6	6385.78		HLDMCW	26415.3	662.479		HNTVWEF	31335	11741.9
301	FNDL	14034.4	3837.44		DSFQK	42577	6140.9		TKCGVN	26389.6	862.419		RMEHIPC	31261.3	3673.75
302	WCEM	14014.1	8520.46		MVHDY	42422.7	13145.9		KEDCPM	26342.1	3389.78		NDKCGTY	31010.1	10490.9
303	HLND	13992.3	1127.42		NILSC	42121	8320.88		IDQFWT	26270.2	9724.85		DNSPYTG	31005.9	2839.93
304	NVCY	13968.7	1523.1		ENLIK	42097.1	9339.54		CLEFSM	26259.8	4961.2		MVIQYPT	30990.8	5862.37
305	MGQS	13927.1	6882.06		REDGH	41724.8	9866.7		VFTNER	25987.5	4974.25		MHQTIYE	30949.5	12817.6
306	KPHG	13895.7	6731.77		TAYQN	41722.4	6078.08		EQKAVG	25886	9041.36		TDNKSFM	30908.4	11993.5
307	EVSA	13880.5	6340.16		SHAGF	41512.1	6396.46		PAHRLD	25704.5	3393.02		EMWYSHA	30634.2	8492.55
308	DARI	13814.7	3721.2		VFSMI	41441.4	4394.72		HDRMWS	25673.2	7788.32		PDAGIYW	29927.2	4709.69
309	DCNE	13789.6	2891.74		SMGHA	41346	17780.5		ISQGVC	25547.3	7475.29		KGMFTPE	29879.6	12812.5
310	DKMA	13723.4	5590.84		DHWSQ	41306.1	5332.42		EVSAPT	25540.5	9914.6		GRFSNVA	29801.8	11659
311	VELG	13628	2797.02		TFMKE	41245	5721.78		SDVYQN	25419.4	3969.53		DMSIPNL	29653.2	7789.48
312	IPEY	13527.9	3105.67		RCKVA	41156.7	30145.4		GSAELV	25391.7	6151.14		QSFHVDE	29605	11597.8
313	IRLD	13514.7	326.24		VSMKD	41099.3	9174.08		VLYGES	25307.6	2936.87		WSYEVNC	29453.9	8965.45
314	APSI	13490.3	3751.55		AMTHF	40584.4	2932.92		PERDFY	25188.8	1615.49		DSGIFQH	29339.7	1881.13
315	TGMW	13484.6	216.515		MDRNG	40205.9	14357.9		FLGQVM	25172.4	4432.73		GKDIMWT	29278.7	4546.73
316	WYPV	13478.4	1092.97		MSHLV	40121.4	8474.69		CTNSML	25000	2735.23		IDTFASH	29235.3	2377.86
317	NDHT	13469	1709.77		CRNGF	39876.2	3480.85		CIMDVK	24898.7	8206.74		VDGIYTA	28917	10227.3
318	AQYE	13461.8	2193.76		YQTIC	39798.7	7203.98		HKIRDA	24791.3	1543.4		HTIGMAL	28910.1	4996.25
319	SRPG	13408.1	6413.58		VMAHN	39487.7	9735.15		MICNGT	24776	6227.83		GYHPCVN	28680.6	10651.2
320	CVWK	13398.3	2263.33		EPAHY	39477.8	5277.16		CGAPHI	24732.3	5906.95		HCSYQKM	28530.2	5176.47
321	SQMW	13390	3255.93		THMVF	39272.3	8925.16		YHQMDG	24724.5	9533.72		NSDAGEF	28509.3	17682.9
322	ISNP	13173	216.03		HQPAV	39174.6	8813.77		MSTKAP	24526.1	15250.4		TKWGMEN	28321.8	9817.07
323	RSEA	13167	731.055		CFGIS	39173.6	8189.48		ERGIDW	24477	13582.7		RGTYCQS	28214.7	6411.48
324	SMTF	13155.2	1546.32		SKTAC	39049.4	6256.04		WEGLVM	24348.6	9518.55		AEHCMRL	28164.6	6542.82
325	KQYM	13144.5	4314.06		AVSNG	39021.2	4501.48		RGNMDT	24294.3	4739.99		GWLPDKC	28114.4	421.598
326	ECKV	13091.1	3283.48		VLPEI	39003.2	5833.74		ACHNQR	24228.5	6912.13		HDRCMSI	27785.4	13774.6
327	DNRV	13091	1364.93		FICMT	38652.3	6760.57		YCDMVF	24220.4	4117.65		PKSHGDC	27714.7	5909.58
328	SVAQ	13084.9	4225.14		PHIAD	38634.7	2048.46		WCDNAP	24174.2	7166.14		VAERHCY	26840.3	10917
329	DHRQ	13076.3	7901.29		FNLEV	38545.1	2976.97		GVTIPD	24165.5	6415.39		GVHDMIY	26691.7	7537.33
330	CHNP	12937.4	1310.47		VLCSN	38185.9	6603.15		DAFCGW	24121.9	3755.35		HCELMFQ	26630.1	5998.74
331	SLAC	12928.5	784.23		SIQAV	38137.2	5484.71		TDGQSE	24023.9	4521.18		EFNDWKT	26452	4855.71
332	RSYL	12860.2	5106.01		YGCSA	38053.3	9280.88		NYWCPR	23771.2	10775.1		SCKNPRA	26402.8	6685.13
333	RVWS	12808.6	2726.52		VMCLH	37626.9	4318.59		YDAGRN	23732.5	8316.44		WCLAMGE	26350.3	4317.98
334	KSYQ	12769.2	7624.09		AVCTY	37557.5	8770.82		SWYQAT	23689.5	5917.65		QFEKVTS	26107.6	7207.84
335	TNEI	12767.1	3161.66		EWSMA	37468.1	7088.1		NGQPRL	23646.5	2572.66		AMSWVCQ	26052	7223.62
336	NKCD	12745	2682.09		INDYQ	37326.8	8916.55		HLDYFN	23636.9	3104.7		FVTPEGY	25946.5	8186.22
337	NDTM	12737.2	479.81		SETFH	37289.2	7851.56		KEPMWC	23566.3	6532.04		INTCSAW	25646.7	8789.37
338	GQPN	12721.8	1417.37		ASITV	36789.4	5001.48		CVFQAD	23557.8	686.955		VPMAYHD	25623.7	3734.21
339	TKGS	12705	1442.51		RKNFS	36742.3	21219.1		GSENIR	23492.2	6864.93		GLDAVFS	25541.2	3900.89
340	GQIS	12693.4	5138.41		PESRD	36725.5	2519.53		YQFGMS	23445.8	4912.71		FNPTLQC	25514.7	9210.66
341	CAPK	12649.4	3240.58		FESPN	36652.3	4862.81		SMLYEK	23444.4	8026.2		MGADRVS	25368.6	12343.3
342	TNIE	12633	4205.06		GDYNA	36606.6	11777.8		DTLICK	23284.5	1343.87		CRGEVAN	25264.2	3647.96
343	KCIA	12602.3	3642.12		EQNHV	36429.7	7262.09		VCEGKQ	23275	4565.33		KCDNFSG	25122.2	11506.2
344	KYWG	12595.2	21561.3		YIEAS	36072	11730.6		VYCSRD	23058.8	4800.08		MLDTCYR	25083.5	18236
345	MNVS	12548.8	4293.61		HSVEF	35900.2	760.681		LCVNTF	23054.8	11647.4		WKCNEDY	25075.7	5559.5
346	VLSG	12502.9	417.145		TPMRD	35865.2	8187.87		QVLEMF	22969.4	3050.14		NQDAELP	25034.4	8390.16
347	IWRH	12466.8	4488.71		IVDYH	35460.6	11059.7		LYMIAN	22742	8647.9		QVEIWTP	25025.7	631.126
348	DSWM	12447.7	3643.75		TKCHR	35274	24507.4		VCLSGP	22652.4	10799		EHCWGMP	24991.5	9764.65
349	ASQT	12438.4	3214.53		DCKVI	35149.2	11529.4		MAPGEQ	22503.9	5596.92		QWPLSNT	24706.6	8040.21
350	SNQD	12321.6	989.65		YTSEA	35086.6	3385.54		HGYPDI	22502.4	955.772		CHSLIKY	24443.6	23857.8
351	CTYD	12274.3	2363.98		MDGPF	34958.4	4923.81		CSMLEH	22446.3	6775.84		CDFGIRT	24301	4653.99
352	AKDC	12240.1	3142.71		SKCTA	34851.1	3386.38		GHCILQ	22395.3	5081.42		DHLYSAE	24201	3656.78
353	MRAS	12234.3	2366.51		EDPAY	34833.7	3773.95		QFVGMD	22268.9	10412.4		EKTGWMD	24166.8	7554.6
354	GSDF	12219.3	1235.94		KTEVN	34597.6	4054.67		CVFLGQ	22228.1	7990.85		EDLHVNI	24052.8	7602.45
355	RYGC	12207.9	11746.5		ACDWF	34239.4	9537.22		YQCVGI	22106.8	15038.7		MSLTGEW	23953.8	8435.99
356	NRAC	12196.3	5330.5		CSVFI	34049	4896.29		AEIHNS	22074.4	15083.1		IEYVDWL	23723.2	3616.28
357	CERG	12189.4	1724.29		VPMHT	34048.7	2128.52		FNGYED	22023.9	8802.22		PDMHWEL	23697.2	1936.33
358	KYLC	12136.4	2014.42		TIVEF	34032.5	3039.68		LEGDPA	21977.8	9687.53		DLPCMAW	23574	4794.02
359	DSTP	12082.7	4235.06		VMEIP	33832.3	4872.85		EPTYSG	21780.4	9500.42		LDAWHEK	23282.2	8862.44
360	CMIK	12069.5	2223.42		TIGYD	33828.2	7767.77		FLGERH	21762.4	5197.7		SPMDEYW	23179	6318.36
361	QKIF	12063.2	7417.18		FDSAP	33717.7	7350.8		DMLRCS	21732.3	9050.55		RDISNAC	23118.8	3884.29
362	SRIC	11867.1	7789.97		YKEDL	33615.1	3567.87		YDIHLV	21643.4	5675.38		YSRCMNK	23061.7	12708.2
363	VGHD	11864.5	952.26		YMDIV	33540.2	3302.15		DPTSRG	21637.8	4498.32		DTKYVAE	22898.2	8119.86
364	VTQG	11862.6	4017.18		GTNYE	33464.9	3093.59		GHYQDP	21618.8	4135.12		DRHNCEF	22760.7	5326.69
365	GIEC	11851.5	529.915		IMLGE	33156.4	3206.09		AMGSLR	21412.8	10538.2		ENDHVYA	22688.4	2353.51
366	GEHS	11829.1	1737.58		TCSFY	32978.6	2329.22		PAKEQD	21298.7	2505.83		QMPKHNE	22571.9	8999.15
367	DCFI	11824.2	2922.87		YDAGI	32898.1	10873.9		MRQFSD	21163.9	5571.17		LDQFGCP	22479.1	10062.4
368	GYSR	11789.7	3229.51		HSEQY	32889.4	3795.49		NECQTY	21093.8	6575.09		MEHTLNP	22299.3	11028.4
369	TINA	11693.2	6799.74		PCTHS	32826	5277.92		NFRPGD	21068.7	8334.38		LGIDSEW	22190.4	14831.3
370	DPKQ	11671.9	6611.97		GCTFD	32720.8	6618.46		CVFSAN	21014.2	8226.28		LCQNTKA	22147.4	8926.82
371	LSEF	11556.1	1849.99		FEMNQ	31870.2	4838.1		LQHADW	20992.5	6616.49		EKDWPCR	21932.9	4271.36
372	NVLW	11539.7	281.47		GSPLD	31639.5	9214.49		QPHCMA	20770.5	2091.43		MWKNTDE	21720.7	11186.7
373	FDTI	11538	1326.98		HEMTP	31634.3	1963.41		LCTRSD	20705.5	3245.05		GVEDMIK	21696.4	10435.2
374	WARG	11525.1	1591.32		EKAYD	31553.4	6016.6		KDATSN	20668.9	7620.28		SENALID	21538.2	6944.46
375	MIHD	11509.5	1728.49		ENKPA	31489	9672.11		KAQMCE	20629.7	12099.4		RDVGMSC	21461.8	6023.57
376	QRHN	11442.6	2608.37		VGDLS	31465.1	10322.2		CSYMAN	20508.6	2920.33		DYECKWQ	21116.7	9878.01
377	GLKF	11399.3	13218.6		FVCAE	31426.2	7379.89		APFIND	20492.6	9732.62		GPENWSH	20992.6	12373.3
378	TAHP	11331.5	6266.64		LDCHR	31421.3	3445.74		MGRDSQ	20492.2	7466.26		CSHLYPM	20728.8	10444.5
379	EFAI	11320.7	4244.42		NGITC	31334.4	6581.96		TAWKVD	20455.1	5168.75		FDHMPSE	20695.4	8883.26
380	FNMI	11309.3	1231.87		YHCSQ	31248.2	6129.24		TVLFEC	20400.1	2904.47		CIHKERW	20396.5	17954.6
381	CIKQ	11256.5	2479.01		DAHNV	31227.5	3613.31		NEDCAF	20266.1	3827.44		WPCMILE	20297.8	10115.7
382	GETH	11197.6	4292.44		ELDKP	31215.3	6307.06		EYTPSR	20226.9	8407.92		CNIEGWY	20092.5	12166
383	HPDV	11184.9	2481.17		ESFTH	31175.6	4611.58		SQCFVG	20205.2	9783.41		QVIEHAW	20015.7	8426.1
384	CKQM	11153.5	921.35		LGDYQ	31066.2	4172.03		SQMGER	20078.7	11042.3		AEQYDVF	19983.9	16272.9
385	VKDC	11086.8	761.09		VNPSG	30782	4750.61		YINCGT	20041.2	8570.66		TCIPDSW	19942.5	5898.75
386	LDNI	11015.1	4284.59		AGEYQ	30464.6	4864.62		FDESAN	19935.2	7576.24		NKCELPM	19907.6	8641.3
387	FPIE	10958	1685.86		MGDQY	30423.1	592.41		EKCDRA	19921.2	2273.54		AEPMQVL	19845.2	14715
388	IHCY	10922.2	5537.47		NDPAT	30390.7	9607.02		MESLWR	19896.8	7200.99		FECVTMP	19757.9	5459.02
389	TFAK	10915.9	889.33		ESLPK	30255.8	867.716		CMEPHG	19890.6	7348.48		FPCKEMG	19723.2	3672.42
390	LECS	10872.6	1421.05		TNHAM	30162.4	5439.88		EWKNLD	19788	14044.5		QVRCEPS	19533.2	12447.3
391	RCGP	10850.2	12935.4		HTGEY	30114.9	6181.3		ATGWDH	19629.9	7896.09		TLDFECW	19179.1	4305.13
392	LTCQ	10834.1	1426.65		KIETD	29995.6	7332.77		HLQTEI	19594	5763.02		HNPQFCM	19130.4	17291.7
393	LFKA	10788.4	10934.8		SGRED	29562.3	8202.2		DEKQPM	19471.3	5044.57		ATGLDKS	18715.6	8750.85
394	RSVH	10692.8	26897.7		DITFC	29490.2	8082.36		SRAMDK	19449.9	5135.72		ADMWQYH	18468.9	5748.58
395	FTLI	10564.3	1820.28		DKIQE	29236	13757.1		GEVCAH	19413.6	7679.47		VEFMGIC	18408.8	3043.43
396	PTGM	10514.2	2227.36		PNEAY	28822.8	11013.9		QCKLMD	19161.6	7677.42		HPDRECF	18306.9	5494.38
397	MDFV	10451.1	2260.84		HSDER	28785.3	5208.83		CEPFHL	18880.2	6331.2		QLFPEMA	18129.8	8903.84
398	QSDI	10405	2268.96		HVLEA	28633.7	5506.8		PSDQGL	18654.9	5270.26		CKYDLFN	17930.3	9410.32
399	SCHI	10279.1	5320.42		TAYCN	28580.3	10511.4		QVTLNH	18631.9	5625.41		HVLQDTA	17927.7	6404.02
400	TCGR	10158.4	282.635		KTDVA	28494.5	7028.41		AETLCY	18620.4	10137		TAHVLMC	17701.4	8394.17
401	QVSA	10129.4	2437.57		TPMQH	28437.6	4436.01		VAETWP	18582.8	6922.59		SYHECVP	17681.2	10917.6
402	LSDC	9889.64	2675.07		ESGFT	28252.4	8754.81		QEHPLV	18504.8	4515.06		GSLQIND	17595.9	3304.26
403	KGFE	9879.42	746.34		EMGFY	27859.7	5009.25		HWDTQI	18353.2	8703.92		CRVSEIG	17532.5	10673.6
404	TIQK	9723.94	5337.54		ICASV	27702	2291.44		YDQMTP	18292.4	9043.55		TDEHNVG	17329.7	11757.1
405	QVGA	9723.72	2891.59		IMDTL	27638.4	9590.02		MGNDPF	18241.8	1918.51		SVGLEWM	17321.3	9067.53
406	IKLG	9707.17	8787.76		DMGEI	27340.7	4651.98		MDYKGS	18239.9	2157.17		SAYCKNR	16763.6	16603.2
407	IVND	9702.97	1139.81		LIDTA	27156	4227.03		MLVAEF	18069.9	7371.98		PHMIESC	16714.9	5218.7
408	NHFE	9697.49	2266.05		NDWEC	27129.3	8224.74		CLSNKE	18067	4548.44		CQDHFSK	16705.5	10575.9
409	VPEH	9682.78	3240.9		PMEAH	26825.3	12479.9		DMREVW	18016.7	10115.4		IQEVNFC	16579.2	3304.43
410	SVRM	9675.33	14463.5		CYGPQ	26476.3	11569.3		QTIACP	17969.6	8670.04		EVDLHYA	16525.9	8597.73
411	TLVC	9486.07	3129.07		TYCSL	26335.1	2292.7		FVNDET	17870.5	5620.85		YRHLCIA	16098.6	38091.7
412	CRHS	9421.49	1067.24		PEQVS	26219.6	2642.36		SCAIMG	17825.7	6043.49		NDQESCT	15916.5	8650.35
413	CNVA	9394.71	3767.87		STNQE	26044.4	13103		LDVYCP	17763.6	4313.61		WDAITMQ	15584.5	5394.1
414	EHCW	9357.71	2698.38		PDVES	25502	3689.36		NFTACY	17709.9	6320.81		TAIDMVQ	15321.3	7819.84
415	CGNV	9025.69	623.17		TCIDY	25124.5	6600.33		CRMEIL	17683.9	4385.34		TVPDHGN	15128.8	5044.84
416	WEDC	8954.65	1568.33		ELAVQ	24913.6	9864.51		DHATRN	17556.5	3853.06		SFLPNDC	15003	6938.25
417	AMCD	8809.98	2715.29		GPTEQ	24887.7	6963.21		MSEVTA	17544	8856.41		CHQDEWG	14972.9	15944.7
418	FALH	8799.32	1353.01		QEVGN	24829	10209		MAWPEL	17513	2095.77		SRDATCH	14863.4	1545.59
419	QEDP	8790.12	4124.98		EFCLG	24685.9	3252.6		PTGCNL	17359.8	7402.67		FTMLPDS	14706	7953.08
420	VECA	8696.28	1361.51		HMESQ	24644.7	10629.1		CSTGFI	16959.9	6724.17		QFCTEGW	14502.4	1842.08
421	KHCD	8683.55	7515.39		IGCDF	24634.6	324.72		ACPLVD	16928.3	14139.9		QDTCNPY	14383	13025.9
422	EQTL	8592.91	3907.7		VCMAL	24580.9	2976.57		PMQDEA	16572	806.762		EPLTQNC	14089.9	2270.9
423	KCIY	8572.3	1225.76		SHPME	24453.1	8350.72		TGVASP	16425.1	10894		HEMCKDG	14023.9	6275.7
424	EHGA	8392.07	2600.9		PMQVE	24296.4	2259.15		RCQPWD	16311	6814.06		GKPDIMC	14005.7	6453.93
425	CGNY	8356.67	833.5		CLQAK	24237.1	7393.51		QSMTEY	16133.7	1611.92		QVCLMYE	13991.1	10785.1
426	CMNT	8344.86	1717.75		ITLCE	23947.9	15110.2		PRSDAE	16061.4	8899.99		GCHENAQ	13865.4	4264.74
427	QNDK	8238.94	1571.4		ESKMD	23922.1	3238.29		MDKEHV	15940.6	6433.7		CDRAWSE	13829.9	5130.24
428	EGCA	8000.42	4292.86		DEIGR	23596.2	4209.58		HAQPIT	15893.5	5004.38		QPICMHS	13396.5	6581.66
429	YCNR	7951.55	2808.53		NDSEL	23419.2	2495.02		CVHQDW	15456.1	4728.99		SNERCQH	13306.5	11627.3
430	TSVM	7807.72	6073.68		DSPHQ	23092.6	9530.29		AGDSTV	15380.8	3649.98		DSYNCLV	13217.3	736.424
431	PEDM	7781.91	1526.69		GEHCF	22416.9	5182.44		IKGCEM	15318.8	3727.3		DTVGEIA	12971.2	5387.48
432	AIGD	7781.02	3598.59		SNMVT	22301.6	3633.65		DHERGN	15190	5814.35		MTRNEPC	12347.7	5166.39
433	CDAF	7648	2349.4		MLDFC	22178.6	1010.31		NHDCGM	14841.4	2679.09		EKQLNDM	12239.9	7263.81
434	TQPL	7638.45	495.485		MDKCI	21984.8	5892.79		ARGCPD	14822.4	10019.6		LMTIVDC	12034.9	4197.17
435	ILCT	7337.65	446.97		IQEDV	21564.9	12925.8		NGIVTM	14818.5	9224.91		CDNELPK	11826.6	5926.79
436	AQGK	7285.35	63.8		LDATS	21301.2	5583.46		CPERNM	14593.9	11382.2		AGRVCME	11753.3	6150.9
437	QCDM	6946.5	2587.52		KDQEH	21113.7	7746.86		DNVMKG	14503.1	5103.7		HGDSCPN	11605.3	5243.74
438	GVMQ	6837.16	179.785		LDEVQ	20694.5	5249.69		TKPFME	14106.5	424.783		AHCGQTD	11416.7	5754.32
439	CAVG	6550.39	981.8		DVISE	20318.8	6960.73		SMQNRE	13878.9	8645.14		SCDLMRE	11296.6	3391.87
440	ACVN	6235.59	1254.8		ECHTF	19678.4	5788.96		DFKPQA	13874	4379.31		ICNHMGE	10996.7	1146.27
441	GYIH	6152.28	509.32		VSMTD	19482.2	3957.3		QERNIS	13666.2	6228.68		DCELVGK	10746.8	8336.52
442	ECAL	6040.69	1212.95		CIHGE	19365.8	9094.63		CFPAGT	13275.6	4426.59		LGCHAPE	10659.2	10114.9
443	CNFY	5994.58	230.86		QSMDT	19335.3	3642.51		NGTVEL	13089.4	10406.6		DTCHARE	10622.4	5460.33
444	LSRQ	5897.56	10369.4		MNVTC	18375.9	4557.88		VTNCDM	12933.7	10305.5		SARCETD	10168.9	6829.91
445	CADE	5561.84	697.695		DKNIE	18232.5	5946.52		HPDTAN	12873.7	3871.47		EWTCQDY	9980.63	8435.46
446	FVKY	5422.97	10059.4		CVLGS	18082.1	12304		MDRHIE	12554	10499.4		MSHGACD	9633.47	5175.14
447	QSFR	5093.96	780.495		GDALE	17213	7301.32		CNPDRI	12421.1	2591.64		CMTLAHI	8845.22	11753.2
448	SCEL	4841.78	3927.71		QDGCL	17207.2	7074.09		EFHCPQ	12173.7	9317.7		VKTMDAC	8606.43	7764.09
449	CYKQ	4465.85	231.94		NIACE	16083.6	3876.42		TANQEC	12158.7	5608.07		CRTEIYH	8525.82	21261.8
450	SDEL	4015.73	689.285		CDMRL	15658.6	12113.9		QMTEDL	11668	9170.68		RSQHTCF	8514.03	16555.4
451	NHDC	3530.94	1152.28		GSQMC	15423.8	6731.12		ECSATQ	11202.8	8411.88		AEYQCMT	8130.18	5936.21
452	KAHC	3265.28	8551.93		ATCGD	14774.1	2575.99		TFREQA	10734.3	8489.38		DCEMVPN	7933.55	6546.4
453	SKGQ	205.523	4246.69		CQTDS	14685.7	6168.9		SVDNYP	10499.3	4603.83		ESCAMHI	7237.96	3761.18
454	ACHW	0	4386.41		CGQVE	13865.9	2925.29		NGEAKC	10035.7	4020.93		DQAICTE	6766.56	11764.1
455	RYAG	0	8902.62		CQHTE	11825.6	10256.9		MVCASN	9767.83	6929.76		NQMGECA	5930.74	3390.39
456	WARM	0	8208.4		ACPTE	11687.3	5876.28		YIDSAC	9674.29	4769.19		PGDMSEC	4962.3	9671.18
457	KFGR	0	17890.2		DHCAM	11624.9	6333.57		ATMRPE	9527.58	7147.36		CVYDHWA	4498.64	15444.1
458	PFRY	0	11184.3		CKEVD	11135.9	7180.52		SMYREA	9288.94	10214.5		TNDVLCH	4270.85	7296.65
459	KRSC	0	11950.1		VNECG	11016.5	5943.66		CSAQYT	9231.89	4616.94		RHCDQNK	2810.31	10304.3
460	VRQK	0	7197.23		CERDG	8985.5	3444.88		CERMTI	5724.45	3594.66		CAHEDSN	0	11055.7

## Sheet: S3
4-mer			5-mer			6-mer			7-mer
Features	Score		Features	Score		Features	Score		Features	Score
ave_Isoelectric_point	0.0951616		ave_Isoelectric_point	0.176765		ave_Isoelectric_point	0.159025		ave_Isoelectric_point	0.146481
ave_Molecular_weight	0.0917811		max_Molecular_weight	0.0880191		min_Isoelectric_point	0.155303		min_Isoelectric_point	0.0639798
max_Molecular_weight	0.0661666		min_Isoelectric_point	0.0849648		sd_Isoelectric_point	0.0439611		sd_Isoelectric_point	0.0530024
min_Isoelectric_point	0.0438203		sd_Isoelectric_point	0.0654133		ave_Molecular_weight	0.034962		min_Hydropathy_index	0.0493859
sd_aroma	0.0374381		min_Hydropathy_index	0.0633791		ave_aroma	0.0325587		max_Isoelectric_point	0.0477164
sd_Ph	0.0360081		max_Isoelectric_point	0.0619276		max_Isoelectric_point	0.0290759		ave_Molecular_weight	0.0354709
min_Molecular_weight	0.0330583		ave_Molecular_weight	0.053436		ave_Pt	0.0283971		max_Polarity	0.0309884
residue2_Molecular_weight	0.0313261		sd_Molecular_weight	0.0414915		sd_aroma	0.0277637		max_Molecular_weight	0.0257706
ave_aroma	0.0295879		max_Polarity	0.0267291		min_Hydropathy_index	0.0247698		residue1_Isoelectric_point	0.0256124
sd_Molecular_weight	0.0292891		ave_aroma	0.0243661		max_Molecular_weight	0.0231856		min_Ph	0.0206574
max_Isoelectric_point	0.0277822		residue3_Molecular_weight	0.0213865		residue1_Isoelectric_point	0.0187698		ave_Pt	0.0199652
residue3_Molecular_weight	0.0275218		sd_aroma	0.0203973		ave_Polarity	0.0178879		sd_Polarity	0.0166571
ave_Pt	0.0255053		max_aroma	0.0190084		sd_Molecular_weight	0.0169341		sd_aroma	0.0166206
sd_Pt	0.0205653		residue3_Isoelectric_point	0.0126467		residue1_Pt	0.0159805		residue5_Isoelectric_point	0.0164091
residue1_Isoelectric_point	0.0193462		residue2_Molecular_weight	0.0122196		max_Ph	0.0144578		ave_aroma	0.0161916
sd_Isoelectric_point	0.0180973		residue2_Isoelectric_point	0.0117781		ave_Ph	0.0142288		ave_Polarity	0.0150782
residue4_Polarity	0.0176613		residue3_Pt	0.0104094		residue5_Isoelectric_point	0.0138425		sd_Hydropathy_index	0.0136684
sd_Hydropathy_index	0.0167309		ave_Polarity	0.00931324		sd_Ph	0.0125877		residue2_Pt	0.0136625
residue2_Pt	0.0167297		sd_Polarity	0.00886918		residue6_Isoelectric_point	0.0125052		sd_Ph	0.0125566
max_Pt	0.016055		sd_Pt	0.00857164		residue5_Pt	0.01249		residue5_Molecular_weight	0.0122252
residue1_Molecular_weight	0.0159278		ave_Pt	0.00825582		sd_Polarity	0.0120433		residue3_Pt	0.0121034
min_Ph	0.0154766		sd_Ph	0.00819867		residue2_Isoelectric_point	0.0119884		residue4_Isoelectric_point	0.0116268
residue2_Isoelectric_point	0.0135574		residue1_Isoelectric_point	0.00795044		sd_Hydropathy_index	0.0117272		min_Pt	0.0111076
min_Polarity	0.012906		residue1_Ph	0.0078352		residue4_Isoelectric_point	0.0112254		ave_Hydropathy_index	0.0102281
min_Hydropathy_index	0.0122074		max_Ph	0.00774129		residue5_Molecular_weight	0.011115		sd_Pt	0.0101574
sd_Polarity	0.0121021		residue1_Molecular_weight	0.00761078		sd_Pt	0.0107802		sd_Molecular_weight	0.00991835
ave_Ph	0.01191		residue2_Pt	0.00746854		residue5_Ph	0.0106268		ave_Ph	0.00952855
residue2_Ph	0.0115336		min_Pt	0.00711406		max_aroma	0.00884268		residue2_Isoelectric_point	0.00938136
ave_Polarity	0.010991		residue1_Pt	0.00709681		ave_Hydropathy_index	0.00872801		residue5_Pt	0.00931041
residue4_Hydropathy_index	0.0109227		residue5_Isoelectric_point	0.00543347		residue3_Isoelectric_point	0.00781262		residue6_Isoelectric_point	0.00862137
max_aroma	0.0108226		residue3_aroma	0.00503537		max_Polarity	0.00763241		residue5_Hydropathy_index	0.00846325
residue3_Polarity	0.0108132		max_Pt	0.00496391		residue3_Molecular_weight	0.00757689		residue1_Pt	0.00829745
ave_Hydropathy_index	0.0108129		residue4_Isoelectric_point	0.00494442		residue2_Molecular_weight	0.00730633		max_Ph	0.00815264
residue4_Molecular_weight	0.0103998		min_Ph	0.0047994		residue5_Hydropathy_index	0.00721495		residue7_Pt	0.00805286
residue3_Isoelectric_point	0.00990774		ave_Ph	0.00450762		residue1_Hydropathy_index	0.00682646		residue5_Ph	0.00798004
max_Ph	0.00978478		residue3_Hydropathy_index	0.00433143		residue6_Ph	0.00678758		residue1_Molecular_weight	0.00785671
residue4_Pt	0.00925094		residue5_Polarity	0.00430254		residue4_Pt	0.00671466		residue2_Molecular_weight	0.00760011
residue2_aroma	0.00850882		ave_Hydropathy_index	0.00429567		residue2_Polarity	0.00659797		residue3_Isoelectric_point	0.00757659
residue3_Hydropathy_index	0.00821918		residue4_Molecular_weight	0.0042554		residue4_Molecular_weight	0.00635488		max_Hydropathy_index	0.00734256
residue1_Hydropathy_index	0.00805587		residue4_Hydropathy_index	0.0041199		residue2_Pt	0.00621551		residue4_Pt	0.00724912
min_Pt	0.00771393		sd_Hydropathy_index	0.00404083		max_Hydropathy_index	0.0060684		min_Polarity	0.00722597
residue2_Hydropathy_index	0.00752874		residue5_Molecular_weight	0.00399398		residue1_Ph	0.00605663		residue5_Polarity	0.00679947
residue4_Isoelectric_point	0.00687477		residue4_Ph	0.00385434		residue4_Ph	0.00600094		residue4_Molecular_weight	0.00665024
residue1_Ph	0.00620031		residue1_Polarity	0.0036729		residue2_Hydropathy_index	0.0058779		residue3_Molecular_weight	0.00635998
residue3_Ph	0.00603948		residue2_Polarity	0.00356495		residue3_Pt	0.00561608		residue3_Polarity	0.0061528
residue4_Ph	0.00588343		residue2_Hydropathy_index	0.00348877		residue1_Polarity	0.00558426		residue3_Hydropathy_index	0.00615172
max_Hydropathy_index	0.00585836		residue1_Hydropathy_index	0.00348486		min_Pt	0.00548154		residue2_Polarity	0.00612639
residue3_aroma	0.00564698		residue5_Hydropathy_index	0.0034612		residue2_Ph	0.00540643		residue1_Hydropathy_index	0.00612114
residue3_Pt	0.00460586		residue5_Ph	0.00329857		residue1_Molecular_weight	0.00536918		residue4_Ph	0.00602569
residue2_Polarity	0.00457838		residue3_Polarity	0.00321844		residue6_Molecular_weight	0.00518118		max_aroma	0.00599981
residue1_Pt	0.00441438		min_Molecular_weight	0.00319915		residue6_Polarity	0.0050235		residue4_Hydropathy_index	0.00586499
residue1_Polarity	0.00385452		residue5_Pt	0.00287939		residue4_Polarity	0.00501425		residue7_Isoelectric_point	0.00584568
max_Polarity	0.00369288		residue4_Pt	0.00275312		residue5_Polarity	0.00473923		residue6_Molecular_weight	0.00582366
residue1_aroma	0.00253741		residue3_Ph	0.00258061		residue3_Polarity	0.00440589		residue7_Molecular_weight	0.00574039
residue4_aroma	0.000828253		residue2_Ph	0.00248924		residue4_Hydropathy_index	0.00434092		residue6_Ph	0.00560682
			max_Hydropathy_index	0.00229391		residue6_Pt	0.0040795		residue1_Polarity	0.00555493
			residue4_Polarity	0.00223131		min_Polarity	0.00396998		residue6_Polarity	0.00553874
			residue2_aroma	0.00181179		residue6_Hydropathy_index	0.00390174		residue6_Pt	0.00549853
			min_Polarity	0.000963775		residue3_Ph	0.00371346		residue3_Ph	0.00534398
			residue1_aroma	0.000575553		min_Ph	0.00369608		residue1_Ph	0.00507366
			residue4_aroma	0.000423115		residue3_aroma	0.00286603		residue6_Hydropathy_index	0.00499338
			residue5_aroma	0.000368317		residue5_aroma	0.00260788		residue4_Polarity	0.00487711
						residue4_aroma	0.00242977		residue7_Ph	0.00478914
						residue3_Hydropathy_index	0.00241813		residue2_Hydropathy_index	0.00461597
						min_Molecular_weight	0.00187575		residue2_Ph	0.00447458
						max_Pt	0.00165653		residue7_Polarity	0.00426603
						residue2_aroma	0.00142947		residue7_Hydropathy_index	0.00417989
						residue1_aroma	0.00119588		max_Pt	0.00415081
						residue6_aroma	0.00119045		min_Molecular_weight	0.00358159
									residue2_aroma	0.00189034
									residue7_aroma	0.00151174
									residue3_aroma	0.00122185
									residue5_aroma	0.00117961
									residue4_aroma	0.000842302
									residue1_aroma	0.00074264
									residue6_aroma	0.000523766

## Sheet: S4
Residue	4-mer	5-mer	6-mer	7-mer
1 (Positive)	19667	35158	33373	50796
0 (Negative)	36504	54505	65014	52009
Total	56171	89663	98387	102805

## Sheet: S5
	4-mer				5-mer				6-mer				7-mer
Number	Sequence	Possibility	Prediction		Sequence	Possibility	Prediction		Sequence	Possibility	Prediction		Sequence	Possibility	Prediction
1	HWMW	0.896008	P		LWRLW	0.994744	P		RLLVYM	1	P		LYYRPLT	0.983923	P
2	YWTN	0.877956	P		LWYRP	0.992966	P		QYRLIP	1	P		LILRWLG	0.983659	P
3	WMYN	0.87748	P		LYYRP	0.992652	P		KAFLHW	1	P		LWYRPLY	0.983176	P
4	WMFN	0.875807	P		QYFSR	0.992513	P		IWRLLH	1	P		RWVSFKT	0.982692	P
5	HMWF	0.874661	P		LWRFT	0.991595	P		GISWRW	1	P		LTLRYPI	0.981865	P
6	LYNW	0.872263	P		LSWYK	0.991125	P		QKLVYS	1	P		KLWRFTG	0.980659	P
7	LWYH	0.871857	P		YVRLY	0.990989	P		KKYLLF	1	P		IYQQRPT	0.979956	P
8	LYIW	0.871626	P		RIFQW	0.990907	P		VYLRKT	1	P		TFLRLMS	0.979854	P
9	WFTQ	0.868869	P		RWFTQ	0.990201	P		GLRFKY	1	P		PWIRNLL	0.979707	P
10	IWYL	0.868711	P		RLYSW	0.989979	P		RWVSFK	1	P		LPFQRLV	0.979166	P
11	HWLY	0.868324	P		FIRSY	0.989883	P		QKFPQY	1	P		PILRPLF	0.978737	P
12	CYWL	0.866631	P		LRYWM	0.989669	P		KYHVVV	1	P		GTYRQLF	0.978014	P
13	WFFT	0.866007	P		RAFYY	0.989145	P		KIKVYL	1	P		SFLRPHI	0.977763	P
14	VFFW	0.865506	P		KSYVW	0.988932	P		KYKIVL	1	P		HYIPRAL	0.977759	P
15	LFFW	0.864969	P		RAYWV	0.988887	P		KYILQV	1	P		YWVTRSL	0.977376	P
16	YMFK	0.8649	P		PWRLW	0.988727	P		LYLVTK	1	P		GYYLRMV	0.977057	P
17	HWIY	0.864877	P		LQWYR	0.988179	P		VLRYLL	1	P		IYLNRQL	0.976832	P
18	MFYL	0.864407	P		WMKLY	0.988047	P		KLFTKT	1	P		IWIQRNT	0.976	P
19	WFYN	0.862525	P		LIWKY	0.987853	P		LIRYTK	1	P		LKIRYSS	0.975956	P
20	LFYF	0.862503	P		RWWTW	0.987468	P		RTVQFV	1	P		KFMYRSG	0.975674	P
21	VFWM	0.862311	P		RVWVQ	0.987022	P		RYLTTL	1	P		RFFMPLY	0.975548	P
22	HWVY	0.861882	P		QRIFW	0.986974	P		KIHLPW	1	P		QFTRLHS	0.973818	P
23	MKWW	0.861752	P		FVFPR	0.986865	P		TKYMVI	1	P		PFLRSQI	0.973763	P
24	WFFL	0.861722	P		WIRSL	0.986807	P		RMFLSF	1	P		PTFTRKL	0.973163	P
25	YFTK	0.861495	P		WYLSK	0.986753	P		LIRWVY	1	P		QPRQYFI	0.972166	P
26	VWQF	0.861184	P		PLYRI	0.986743	P		VYKSFA	1	P		RLFNYGN	0.971838	P
27	HWYV	0.860996	P		QRILW	0.986622	P		WYRPLY	1	P		KFVFRSS	0.971689	P
28	YYLQ	0.86073	P		YVRYL	0.986481	P		RQWSLV	1	P		WMVIRIN	0.971434	P
29	LFWN	0.86058	P		WIYRY	0.986415	P		IYRLKL	1	P		TALRYNI	0.969931	P
30	LFWI	0.860027	P		AVRWP	0.986335	P		KWVTFI	1	P		FIQQRLT	0.969923	P
31	LYFL	0.859743	P		GWRSY	0.986262	P		RYYPSV	1	P		KISQRYQ	0.969923	P
32	WLYN	0.859349	P		QRWFT	0.98611	P		LIRLFT	1	P		FYQKRTL	0.969865	P
33	LFYM	0.858679	P		YLWSK	0.985864	P		KYKVVL	1	P		ILLRNSW	0.969865	P
34	LYLW	0.858165	P		WVLSR	0.985849	P		RQLIYL	1	P		IFSRFSI	0.969865	P
35	NWFM	0.857734	P		WFFTK	0.98584	P		VIYRLK	1	P		PALRQFQ	0.969854	P
36	LFYL	0.857708	P		GYYLR	0.985831	P		WIYRYL	1	P		RQLIYLS	0.969806	P
37	LFYW	0.857593	P		NIRWW	0.985793	P		RLFTKV	1	P		RIFQWQN	0.96966	P
38	WWKW	0.857339	P		LLYRY	0.98578	P		RILQYM	1	P		FRQTYGI	0.969615	P
39	LYYN	0.857333	P		NLRYW	0.985657	P		HKLVYI	1	P		SWIYRYL	0.969573	P
40	QWYC	0.856994	P		WVKLY	0.985612	P		KKLTFV	1	P		LLYRNGI	0.969453	P
41	WFNK	0.856879	P		LYRTT	0.985548	P		PWRTVY	1	P		TQYRFGH	0.969261	P
42	YWMD	0.855572	P		RWFFT	0.985434	P		KFYTVI	1	P		YYQQRPV	0.969242	P
43	WWNF	0.855304	P		YLRQW	0.985414	P		KFVMKV	1	P		LPVLRWL	0.969171	P
44	VYMF	0.854978	P		GLYYR	0.985376	P		RWMLPS	1	P		PLFRLST	0.969102	P
45	LHWY	0.854911	P		WYRPL	0.985353	P		RPFLSW	1	P		LLVPRYS	0.9691	P
46	VYFL	0.854232	P		LIRYT	0.985253	P		PTRYTL	1	P		QILRPLF	0.968754	P
47	CYQW	0.85381	P		WRWWT	0.985119	P		IYRYLT	1	P		QIMRPLF	0.968754	P
48	WNFN	0.853561	P		KFWKL	0.985058	P		LKFWVF	1	P		WIVKNRL	0.968245	P
49	YYIL	0.85324	P		AYYRV	0.984959	P		SYKFIP	1	P		RQFMKSL	0.968202	P
50	WQWN	0.853216	P		WIIRQ	0.984841	P		WIKYSV	1	P		WIIRQQN	0.967923	P
1	ENAC	0.0655558	N		TEVMD	0.00653648	N		NLADTY	0	N		LSEGSVT	0.00607468	N
2	NDCA	0.0654094	N		CCDEL	0.00653236	N		QEFDQA	0	N		ASTTDDC	0.00606849	N
3	ESDI	0.0654028	N		SCNSE	0.00650916	N		DGEEGS	0	N		VCDESSP	0.00606849	N
4	DECA	0.0653939	N		DNVEQ	0.00650404	N		MFDTDG	0	N		VSEANTC	0.00606849	N
5	ECTV	0.0652518	N		EDVSQ	0.00650209	N		TEFDSA	0	N		CSPTADG	0.00605015	N
6	GECA	0.0652392	N		CDVAE	0.00648655	N		DQGHAD	0	N		TPECQAA	0.00605015	N
7	EDSI	0.0650895	N		TQTDA	0.00647108	N		DEASGC	0	N		CSNGLDE	0.00605015	N
8	VTGE	0.0650069	N		NTCEN	0.00645838	N		DADCSG	0	N		DGTCADS	0.00605015	N
9	ETGV	0.0649446	N		NETDV	0.00645228	N		TEPVTL	0	N		TDDVMCA	0.00605015	N
10	VDLC	0.0648732	N		DTLAE	0.00644911	N		DSTTGA	0	N		ENCGDAC	0.00605015	N
11	SVGE	0.0648643	N		EDVNN	0.0064472	N		MVDAGI	0	N		CATGDCA	0.00605015	N
12	GETM	0.0647404	N		NTLAE	0.00644054	N		DGTSSA	0	N		TLEVESS	0.00605015	N
13	LCES	0.0645306	N		VSDAT	0.00643398	N		NGDEPL	0	N		VPELDCS	0.00604651	N
14	DEAC	0.0644938	N		QDCSE	0.00641623	N		MVEAGI	0	N		EECGSPC	0.00602817	N
15	DSAI	0.0642926	N		ENVTE	0.00641051	N		EASSTG	0	N		DGNTMVA	0.00602817	N
16	QCDI	0.0640525	N		DEECS	0.00640465	N		VNPESQ	0	N		NTECLAE	0.00602817	N
17	ETVG	0.0639145	N		EDECS	0.00640465	N		NEAAGT	0	N		EGENQCA	0.00602817	N
18	DVLC	0.0638701	N		DTMTE	0.00640317	N		EVDPTQ	0	N		EGDMVEC	0.00602817	N
19	ESCL	0.0638375	N		ECCNE	0.00638699	N		DPAIAA	0	N		EANTCEN	0.00602817	N
20	LCSE	0.0636273	N		ECNLS	0.00637711	N		EGLLAT	0	N		ECLNACA	0.00602817	N
21	DVAV	0.0631415	N		TDLAN	0.00632552	N		GDALTL	0	N		TEPTVNS	0.00602198	N
22	QCTD	0.0630929	N		EQVCN	0.00632006	N		EIESSG	0	N		ETNDVLS	0.00602198	N
23	NCAV	0.0629603	N		DTDAE	0.00631508	N		AGTEAD	0	N		SDEISSA	0.00602198	N
24	DVAG	0.0624237	N		ECPCE	0.00629432	N		TPEVDN	0	N		CEDTSDC	0.00602198	N
25	DCTA	0.0623239	N		SNDCA	0.00629171	N		NVPQET	0	N		DVESLPS	0.006	N
26	LDVA	0.0620833	N		SEVAS	0.00628134	N		ALPDTA	0	N		EDHCLAP	0.00449363	N
27	CDAV	0.0617766	N		EDCTP	0.00627585	N		QVPEAV	0	N		VTEDGCT	0.00438237	N
28	ESVL	0.0616872	N		ENVTS	0.0062749	N		STTEGA	0	N		NAHDSVT	0.00431681	N
29	VCES	0.0615492	N		ENVST	0.0062749	N		CDTPCE	0	N		DMQDCSE	0.00426667	N
30	ECGI	0.0602981	N		SCLED	0.00627154	N		EVPSTL	0	N		NPTLECH	0.00418864	N
31	DVSA	0.0602615	N		ENCTS	0.00626208	N		EMGTTT	0	N		VENGCSD	0.00409666	N
32	DVVA	0.0601084	N		DCPME	0.00625318	N		EPEQSL	0	N		CDNGTEM	0.00405015	N
33	NCSA	0.0594788	N		DDEAC	0.00623457	N		CPAESF	0	N		ESEGCSS	0.00405015	N
34	CDVA	0.0593685	N		EDVAN	0.00623445	N		MDNCTI	0	N		DGENCTS	0.00405015	N
35	SCVE	0.0588633	N		NECCQ	0.00622487	N		DTTQGD	0	N		DASSVCE	0.00405015	N
36	ECVG	0.058415	N		SCPDA	0.00621588	N		NETIGG	0	N		EDTNLCA	0.00405015	N
37	DSVA	0.058192	N		TCVAD	0.00620633	N		DDESQC	0	N		SVDSQTA	0.00405015	N
38	VDSA	0.0581828	N		TDQCE	0.00620235	N		EDECSE	0	N		ECDGMSE	0.00405015	N
39	DVCA	0.0578942	N		TNVES	0.00619261	N		CSPFEM	0	N		CAPGSDP	0.00402817	N
40	VDVA	0.0578769	N		ENVQS	0.00616818	N		NLPEEV	0	N		QEDVANS	0.00402817	N
41	ECGA	0.0577107	N		NDCAE	0.0061542	N		EQCPCT	0	N		SGEPVSE	0.00402817	N
42	ESGV	0.0576639	N		DCTAE	0.0061223	N		CLDLTC	0	N		GSEDCTP	0.00307468	N
43	TDVA	0.0571889	N		ENLCS	0.00610347	N		DVGACL	0	N		TVDMEST	0.00228864	N
44	DCVL	0.0571475	N		NDTAE	0.0060792	N		VCADGL	0	N		TDQCEQM	0.00218864	N
45	ESVC	0.0564894	N		TEVAD	0.00606357	N		EVANPP	0	N		TEDGCTS	0.00205015	N
46	ECSV	0.0558665	N		DDQAT	0.00605491	N		AGNEGA	0	N		STPDAVM	0.00205015	N
47	ECSI	0.0556552	N		TECDQ	0.00595326	N		DGTTTA	0	N		CQTGDCA	0.00205015	N
48	ECTL	0.0543589	N		TDVEN	0.00591739	N		TEDQSG	0	N		SNDADCS	0.00202198	N
49	DCAL	0.0543387	N		DCCQE	0.00582708	N		STAGDT	0	N		EDQMNCS	0.00202198	N
50	QDCC	0.0509502	N		NELTT	0.0058131	N		QSDQGV	0	N		EPEALSC	0.002	N

## Sheet: S6
4-mer				5-mer				6-mer				7-mer
Number	Sequence	Origin	Position	Number	Sequence	Origin	Position	Number	Sequence	Origin	Position	Number	Sequence	Origin	Position
1	HWMW	Braching enzyme [Precursor], rice (Oryza sativa)	435_438	1	LWRLW	Interleukin 21 receptor (precursor), human (Homo sapiens)	260_264	1	RLLVYM	ovostatin precursor (ovomacroglobulin), chicken (Gallus gallus)	545_550	1	LYYRPLT	ovostatin precursor (ovomacroglobulin), chicken (Gallus gallus)	662_668
1	HWMW	Starch braching enzyme rbe4, rice (Oryza sativa)	450_453	2	LWYRP	Secretory carrier membran protein, rice (Oryza sativa)	172_176	2	QYRLIP	retinol binding protein RBP, bovine (Bos taurus)	164_169	2	LILRWLG	Glycinin, fragment, peanut (Arachis hypogaea)	362_368
2	YWTN	Putative intergral membrane protein,rice (Oryza sativa)	197_200	3	LYYRP	ovostatin precursor (ovomacroglobulin), chicken (Gallus gallus)	662_666	3	KAFLHW	Tubulin beta-1 chain, garden pea (Pisum sativum)	392_397	2	LILRWLG	Glycinin, peanut (Arachis hypogaea)	385_391
2	YWTN	Putative intergral membrane protein,rice (Oryza sativa)	224_227	4	QYFSR	legumin 1, mayze (Zea mayze)	71_75	3	KAFLHW	Tubulin beta-3 chain , fragment, garden pea (Pisum sativum)	383_388	2	LILRWLG	Arachin 6, peanut (Arachis hypogaea)	384_390
3	WMYN	legumin A , precursor, garden pea (Pisum sativum)	150_153	5	LWRFT	Integral membrane protein, rice (Oryza sativa)	10_14	3	KAFLHW	Tubulin beta-2 chain, fragment, garden pea (Pisum sativum)	390_395	3	LWYRPLY	Secretory carrier membran protein, rice (Oryza sativa)	172_178
4	WMFN	Putative transmembrane protein, rice (Oryza sativa)	18_21	6	LSWYK	chicken connectin (titin), fragment (Gallus gallus)	906_910	3	KAFLHW	Tubulin beta-1 chain, rice (Oryza sativa)	392_397	4	RWVSFKT	11S globulin seed storage protein G3 precursor , common sunflower (Helianthus annuus)	425_431
5	HMWF	Na/K ATPase alpha subunit isoform 2 of rainbow trout (Oncorhynchus mykiss)	380_383	7	YVRLY	legumin chain B fragment, broad bean (Vicia faba)	199_203	3	KAFLHW	Tubulin beta-2 chain, rice (Oryza sativa)	392_397	5	LTLRYPI	actin (gene ACT)	65_71
6	LYNW	precursor of phytohemagglutinin, runner bean (Phaseolus coccineus)	147_150	7	YVRLY	legumin J, garden pea (Pisum sativum)	351_355	3	KAFLHW	Tubulin beta-3 chain, rice (Oryza sativa)	392_397	5	LTLRYPI	actin (gene ACT1)	66_72
7	LWYH	Low molecular weight (LMW) glutenin, wheat (Triticum aestivum)	20_23	7	YVRLY	legumin K fragment, garden pea (Pisum sativum)	220_224	3	KAFLHW	Tubulin beta chain, barley (Hordeum vulgare)	392_397	6	KLWRFTG	Integral membrane protein, rice (Oryza sativa)	9_15
7	LWYH	glutenin, low molecular weight (LMW), wheat (Triticum aestivum) subunit group 1 type I	44_47	8	RIFQW	ovostatin precursor (ovomacroglobulin), chicken (Gallus gallus)	185_189	4	IWRLLH	Lactotransferrin precursor (Lactoferrin), fragment, horse (Equus caballus)	273_278	7	IYQQRPT	7 S globulin, oriental sesame (Sesamum indicum)	397_403
8	LYIW	Integral membrane protein, rice (Oryza sativa)	289_292	9	RWFTQ	Glycinin, peanut (Arachis hypogaea)	373_377	5	GISWRW	Probable cell division protein ftsW	202_207	8	TFLRLMS	collagen alpha 1(I) chain precursor, chicken (Gallus gallus)	1320_1326
9	WFTQ	Glycinin, peanut (Arachis hypogaea)	374_377	10	RLYSW	ovostatin precursor (ovomacroglobulin), chicken (Gallus gallus)	457_461	6	QKLVYS	bilin binding protein BBP, white butterfly (Pieris brassicae)	173_178	9	PWIRNLL	Integral membrane protein OsNramp3 fragment, rice (Oryza sativa)	317_323
10	IWYL	Probable cell division protein ftsW	131_134	11	FIRSY	Starch debranching enzyme,rice (Oryza sativa)	149_153	7	KKYLLF	beta-lactoglobulin precursor, goat (Capra hircus)	100_105	10	LPFQRLV	Histone H3, garden pea (Pisum sativum)	65_71
11	HWLY	legumin 1, mayze (Zea mayze)	172_175	11	FIRSY	Starch debranching enzyme [Precursor],rice (Oryza sativa)	149_153	7	KKYLLF	beta-lactoglobulin, sheep (Ovis aries)	100_105	10	LPFQRLV	Histone H3, rice (Oryza sativa)	65_71
11	HWLY	Glutelin, rice (Oryza sativa)	177_180	12	LRYWM	1,4-alpha-glucan branching enzyme, chloroplast precursor	394_398	7	KKYLLF	beta-lactoglobulin, gen. var. A, fragment (17-177), bovine (Bos taurus)	99_104	11	PILRPLF	Gamma-gliadin, wheat (Triticum aestivum), fragment	150_156
12	CYWL	Seed allergenic protein RA14, precursor, rice (Oryza sativa)	152_155	13	RAFYY	arcelin precursor, french bean (Phaseolus vulgaris)	69_73	7	KKYLLF	beta-lactoglobulin, gen. var. C, fragment (17-177), bovine (Bos taurus)	99_104	11	PILRPLF	Gamma-gliadin, wheat (Triticum aestivum)	239_245
12	CYWL	Seed allergenic protein RA17, precursor, rice (Oryza sativa)	149_152	14	KSYVW	ovostatin precursor (ovomacroglobulin), chicken (Gallus gallus)	863_867	7	KKYLLF	beta-lactoglobulin, gen. var. D, fragment (17-177), bovine (Bos taurus)	99_104	11	PILRPLF	Gamma-gliadin, wheat (Triticum aestivum), fragment	140_146
12	CYWL	Seed allergenic protein RAG2, precursor, rice (Oryza sativa)	153_156	15	RAYWV	Starch debranching enzyme,rice (Oryza sativa)	86_90	7	KKYLLF	beta-lactoglobulin, gen. var. E, fragment (17-177), bovine (Bos taurus)	99_104	12	GTYRQLF	Tubulin alpha-3 chain, barley (Hordeum vulgare)	81_87
12	CYWL	Allergenic protein, rice (Oryza sativa) [japonica cultivar-group]	153_156	15	RAYWV	Starch debranching enzyme [Precursor],rice (Oryza sativa)	86_90	7	KKYLLF	beta-lactoglobulin, gen. var. F, fragment (17-177), bovine (Bos taurus)	99_104	13	SFLRPHI	Gamma-hordein 3, barley (Hordeum vulgare)	164_170
12	CYWL	Allergenic protein, fragment, rice (Oryza sativa) [japonica cultivar-group]	146_149	16	PWRLW	Interleukin 21 receptor (precursor), mouse (Mus musculus)	259_263	7	KKYLLF	beta-lactoglobulin, gen. var. G, fragment (17-177), bovine (Bos taurus)	99_104	14	HYIPRAL	Tubulin gamma-2 chain, rice (Oryza sativa)	59_65
12	CYWL	Allergenic protein, rice (Oryza sativa) [japonica cultivar-group]	149_152	17	LQWYR	Putative transmembrane protein, rice (Oryza sativa)	254_258	7	KKYLLF	beta-lactoglobulin, gen. var. H, fragment (17-177), bovine (Bos taurus)	99_104	15	YWVTRSL	Starch debranching enzyme,rice (Oryza sativa)	88_94
12	CYWL	Allergenic protein, rice (Oryza sativa) [japonica cultivar-group]	152_155	18	WMKLY	Myosin heavy chain, Cyprinus carpio (Common carp) (Q90339)	830_834	7	KKYLLF	beta-lactoglobulin, gen. var. I, fragment (17-177), bovine (Bos taurus)	99_104	15	YWVTRSL	Starch debranching enzyme [Precursor],rice (Oryza sativa)	88_94
12	CYWL	Allergenic protein, fragment, rice (Oryza sativa) [japonica cultivar-group]	98_101	19	LIWKY	Plasma membrane H+ATPase,rice (Oryza sativa)	662_666	7	KKYLLF	beta-lactoglobulin, gen. var. J, fragment (17-177), bovine (Bos taurus)	99_104	16	GYYLRMV	phycocyanin	89_95
12	CYWL	Allergenic protein, fragment, rice (Oryza sativa) [japonica cultivar-group]	96_99	20	RWWTW	Hordoindoline A-12, fragment, barley (Hordeum vulgare)	61_65	7	KKYLLF	beta-lactoglobulin, gen. var. W, fragment (17-177), bovine (Bos taurus)	99_104	17	IYLNRQL	Lactoferrin receptor (Neisseria gonorrhoeae)	286_292
12	CYWL	Allergenic protein, fragment, rice (Oryza sativa) [japonica cultivar-group]	100_103	20	RWWTW	Hordoindoline A-10, fragment, barley (Hordeum vulgare)	61_65	7	KKYLLF	beta-lactoglobulin, gen. var. B, fragment (17-177), bovine (Bos taurus)	99_104	18	IWIQRNT	P34 probable thiol protease, precursor, soybean (Glycine max)	333_339
12	CYWL	Alpha-amylase inhibitor BMAI-1, precursor, fragment, barley (Hordeum vulgare)	131_134	20	RWWTW	Hordoindoline A-13, fragment, barley (Hordeum vulgare)	47_51	8	VYLRKT	Myosin heavy chain, Cyprinus carpio (Common carp) (Q90339)	14_19	19	LKIRYSS	Starch debranching enzyme,rice (Oryza sativa)	865_871
13	WFFT	60S ribosomal protein L27, garden pea (Pisum sativum)	128_131	20	RWWTW	Hordoindoline A-9, fragment, barley (Hordeum vulgare)	61_65	9	GLRFKY	Putative intergral membrane protein,rice (Oryza sativa)	173_178	19	LKIRYSS	Starch debranching enzyme [Precursor],rice (Oryza sativa)	863_869
14	VFFW	narbonin from Vicia narbonensis	258_261	20	RWWTW	Hordoindoline A-8, fragment, barley (Hordeum vulgare)	61_65	10	RWVSFK	11S globulin seed storage protein G3 precursor , common sunflower (Helianthus annuus)	425_430	20	KFMYRSG	paramyosin (Sarcoptes scabiei) (Q9BMM8)	7_13
14	VFFW	narbonin from Vicia pannonica	259_262	20	RWWTW	Hordoindoline A-7, fragment, barley (Hordeum vulgare)	61_65	11	QKFPQY	alpha-S2-casein gen. var. A, precursor, bovine (Bos taurus)	105_110	21	RFFMPLY	Interleukin 21 receptor (precursor), human (Homo sapiens)	275_281
15	LFFW	Plasma membrane H+ATPase,rice (Oryza sativa)	735_738	20	RWWTW	Hordoindoline A-6, fragment, barley (Hordeum vulgare)	61_65	11	QKFPQY	alpha S2-casein gen. var. C, fragment (16-222), bovine (Bos taurus)	90_95	22	QFTRLHS	Proline-rich protein, garden pea (Pisum sativum)	193_199
15	LFFW	Plasma membrane H+ATPase,rice (Oryza sativa)	735_738	20	RWWTW	Hordoindoline A-5, fragment, barley (Hordeum vulgare)	61_65	11	QKFPQY	alpha S2-casein gen. var. D, fragment (16-213), bovine (Bos taurus)	81_86	23	PFLRSQI	Avenin-3 precursor, oat (Avena sativa)	84_90
16	YMFK	Glyceraldehyde 3-phosphate dehydrogenase of rainbow trout ( Oncorhynchus mykiss)	44_47	21	RVWVQ	profilin-1, barley (Hordeum vulgare)	31_35	12	KYHVVV	Putative transmembrane protein, rice (Oryza sativa)	54_59	23	PFLRSQI	Avenin, precursor, oat (Avena sativa)	63_69
17	HWIY	Cruciferin, 11S globulin, rape (Brassica napus)	174_177	22	QRIFW	Glutenin, high molecular weight (HMW), precursor, wheat (Triticum aestivum), subunit DX5	99_103	13	KIKVYL	ovalbumin, egg albumin, chicken (Gallus gallus)	278_283	23	PFLRSQI	Avenin, precursor, oat (Avena sativa)	89_95
18	MFYL	Putative transmembrane protein, rice (Oryza sativa)	179_182	22	QRIFW	Glutenin, high molecular weight (HMW), wheat (Triticum aestivum) subunit 1Dx2.1	99_103	14	KYKIVL	Starch braching enzyme rbe4, rice (Oryza sativa)	786_791	23	PFLRSQI	Avenin N9, oat (Avena sativa)	70_76
19	WFYN	Glutelin, precursor, rice (Oryza sativa)	168_171	22	QRIFW	Glutenin, high molecular weight (HMW), wheat (Triticum aestivum) subunit (fragment)	99_103	15	KYILQV	egg-white cystatin, precursor, chicken (Gallus gallus)	82_87	24	PTFTRKL	chicken connectin (titin), fragment (Gallus gallus)	469_475
19	WFYN	Glutelin, precursor, rice (Oryza sativa)	168_171	22	QRIFW	Glutenin, high molecular weight (HMW), wheat (Triticum aestivum) subunit (fragment)	99_103	16	LYLVTK	chicken connectin (titin), fragment (Gallus gallus)	1139_1144	25	QPRQYFI	myosin subfragment-1, chicken (Gallus gallus)	453_459
19	WFYN	Glutelin, type B-1, precursor, rice (Oryza sativa)	168_171	22	QRIFW	Glutenin, high molecular weight (HMW), wheat (Triticum aestivum) subunit (fragment)	99_103	17	VLRYLL	Starch braching enzyme rbe4, rice (Oryza sativa)	465_470	26	RLFNYGN	Braching enzyme [Precursor], rice (Oryza sativa)	441_447
19	WFYN	Glutelin, type B-2, precursor, rice (Oryza sativa)	168_171	22	QRIFW	Glutenin, high molecular weight (HMW), wheat (Triticum aestivum) subunit (fragment)	99_103	18	KLFTKT	Germin-like protein 4, rice (Oryza sativa)	135_140	27	KFVFRSS	1,4-alpha-glucan branching enzyme, chloroplast precursor	809_815
20	LFYF	11S globulin, precursor, oat (Avena sativa)	10_13	22	QRIFW	glutenin, high molecular weight (HMW), wheat (Triticum aestivum)	79_83	19	LIRYTK	serum albumin, precursor, chicken (Gallus gallus)	436_441	28	WMVIRIN	myosin subfragment-1, chicken (Gallus gallus)	440_446
20	LFYF	11S globulin, oat (Avena sativa)	10_13	22	QRIFW	glutenin, high molecular weight (HMW), wheat (Triticum aestivum),subunit	99_103	20	RTVQFV	Tubulin alpha-1 chain, rice (Oryza sativa)	339_344	28	WMVIRIN	Myosin heavy chain, Cyprinus carpio (Common carp) (Q90339)	440_446
21	VFWM	legumin A , precursor, garden pea (Pisum sativum)	148_151	23	FVFPR	Germin-like protein 4, rice (Oryza sativa)	147_151	20	RTVQFV	Tubulin alpha-1 chain, barley (Hordeum vulgare)	339_344	29	TALRYNI	ovostatin precursor (ovomacroglobulin), chicken (Gallus gallus)	1324_1330
22	HWVY	ovoglycoprotein, precursor, chicken (Gallus gallus)	45_48	24	WIRSL	allergen Api g 5, (fragments), celery (Apium graveolens)	69_73	21	RYLTTL	Lactoferrin, bovine (Bos taurus)	323_328	30	FIQQRLT	chicken connectin (titin), fragment (Gallus gallus)	863_869
23	MKWW	Beta-2 adrenergic receptor, rainbow trout (Oncorhynchus mykiss)	174_177	25	WYLSK	collagen alpha 1(I) chain precursor, chicken (Gallus gallus)	1279_1283	21	RYLTTL	Lactoferrin precursor, bovine (Bos taurus)	342_347	31	KISQRYQ	alpha-S2-casein gen. var. A, precursor, bovine (Bos taurus)	181_187
24	WFFL	Secretory carrier membran protein, rice (Oryza sativa)	191_194	26	PLYRI	B1-hordein, precursor, barley (Hordeum vulgare)	279_283	21	RYLTTL	Lactoferrin (Fragment), bovine, (Bos taurus)	315_320	31	KISQRYQ	alpha S2-casein gen. var. C, fragment (16-222), bovine (Bos taurus)	166_172
25	YFTK	Disease resistance response protein Pi49, garden pea (Pisum sativum)	120_123	26	PLYRI	B3-hordein, fragment, barley (Hordeum vulgare)	249_253	21	RYLTTL	Lactoferrin (Fragment), bovine, (Bos taurus)	107_112	31	KISQRYQ	alpha S2-casein gen. var. D, fragment (16-213), bovine (Bos taurus)	157_163
26	VWQF	Plasma membrane H+ATPase,rice (Oryza sativa)	821_824	26	PLYRI	Seed storage protein, fragment, barley (Hordeum vulgare)	16_20	21	RYLTTL	Lactoferrin (Fragment), bovine, (Bos taurus)	48_53	32	FYQKRTL	Lactoferrin binding protein B, (Moraxella catarrhalis)	10_16
27	HWYV	Tubulin alpha-1 chain, garden pea (Pisum sativum)	406_409	27	QRILW	glutenin, high molecular weight glutenin (HMW), wheat (Triticum aestivum), subunit x (precursor)	96_100	22	KIHLPW	Interleukin 21 receptor (precursor), mouse (Mus musculus)	255_260	33	ILLRNSW	Putative integral membrane protein, rice (oryza sativa)	351_357
27	HWYV	Tubulin alpha-1 chain, rice (Oryza sativa)	406_409	27	QRILW	glutenin, high molecular weight glutenin (HMW), wheat (Triticum aestivum), subunit x (precursor)	96_100	23	TKYMVI	profilin-1, barley (Hordeum vulgare)	70_75	34	IFSRFSI	Glutelin, type B-2, precursor, rice (Oryza sativa)	5_11
27	HWYV	Tubulin alpha-1 chain, barley (Hordeum vulgare)	406_409	27	QRILW	High molecular weight glutenin (HMW) subunit x, precursor, rye (Secale cereale)	96_100	23	TKYMVI	Profilin A, rice (Oryza sativa subsp.japonica)	70_75	35	PALRQFQ	Precursor of G4 glycinin, soybean (Glycine max)	417_423
27	HWYV	Tubulin alpha-2 chain, barley (Hordeum vulgare)	406_409	28	YVRYL	alpha-S2-casein gen. var. A, precursor, bovine (Bos taurus)	218_222	23	TKYMVI	Profilin-1, soybean (Glycine max)	70_75	36	RQLIYLS	serum albumin, precursor, chicken (Gallus gallus)	242_248
27	HWYV	Tubulin alpha-3 chain, barley (Hordeum vulgare)	406_409	28	YVRYL	alpha S2-casein gen. var. C, fragment (16-222), bovine (Bos taurus)	203_207	23	TKYMVI	Profilin, peanut (Arachis hypogaea)	70_75	37	RIFQWQN	ovostatin precursor (ovomacroglobulin), chicken (Gallus gallus)	185_191
28	YYLQ	Teosinte branched1 protein, rice (Oryza sativa)	363_366	28	YVRYL	alpha S2-casein gen. var. D, fragment (16-213), bovine (Bos taurus)	194_198	24	RMFLSF	Hemoglobin alpha chain(HUMAN)	31_36	38	FRQTYGI	Lactoferrin binding protein A precursor (Neisseria meningitidis)	252_258
29	LFWN	Secretory carrier membran protein, rice (Oryza sativa)	135_138	29	WIYRY	oleosin, oriental sesame (Sesamum indicum)	97_101	24	RMFLSF	bovine hemoglobin alpha chain	31_36	39	SWIYRYL	oleosin, oriental sesame (Sesamum indicum)	96_102
30	LFWI	Putative integral membrane protein, rice (oryza sativa)	449_452	30	AVRWP	Alpha-gliadin storage protein, wheat (Triticum aestivum)	20_24	25	LIRWVY	Chloroplast envelope membrane protein, rice (Oryza sativa)	173_178	40	LLYRNGI	legumin-related high molecular weight polypeptide, broad bean (Vicia faba)	417_423
31	LYFL	Intelectin 1a (precursor), mouse (Mus musculus)	55_58	31	GWRSY	Glucocorticoid receptor, rainbow trout ( Oncorhynchus mykiss)	584_588	25	LIRWVY	Chloroplast envelope membrane protein, rice (Oryza sativa)	173_178	40	LLYRNGI	legumin B , fragment, garden pea (Pisum sativum)	214_220
31	LYFL	Intelectin 1 (precursor), human (Homo sapiens))	55_58	32	QRWFT	Glycinin, peanut (Arachis hypogaea)	372_376	26	VYKSFA	ovostatin precursor (ovomacroglobulin), chicken (Gallus gallus)	1051_1056	40	LLYRNGI	Legumin, minor small protein, precursor, garden pea (Pisum sativum)	442_448
32	WLYN	11S globulin (b-legumin-like chain), ginkgo (Ginkgo biloba)	141_144	33	YLWSK	Putative gamma 2 hordein, fragment, barley (Hordeum vulgare)	132_136	27	WYRPLY	Secretory carrier membran protein, rice (Oryza sativa)	173_178	41	TQYRFGH	myosin subfragment-1, chicken (Gallus gallus)	756_762
32	WLYN	legumin 1, mayze (Zea mayze)	173_176	34	WVLSR	bilin binding protein BBP, white butterfly (Pieris brassicae)	144_148	28	RQWSLV	1,4-alpha-glucan branching enzyme, chloroplast precursor	617_622	42	YYQQRPV	kappa-casein, goat (Capra hircus)	63_69
32	WLYN	Glutelin, rice (Oryza sativa)	178_181	35	WFFTK	60S ribosomal protein L27, garden pea (Pisum sativum)	128_132	29	IYRLKL	Probable cell division protein ftsW	64_69	43	LPVLRWL	legumin A , precursor, garden pea (Pisum sativum)	371_377
32	WLYN	Photosystem Q(B) protein, rice (Oryza sativa)	105_108	36	GYYLR	phycocyanin	89_93	30	KWVTFI	serum albumin, precursor, bovine (Bos taurus)	2_7	44	PLFRLST	Starch debranching enzyme,rice (Oryza sativa)	872_878
32	WLYN	Photosystem Q(B) protein, rice (Oryza sativa)	105_108	36	GYYLR	Starch debranching enzyme,rice (Oryza sativa)	526_530	31	RYYPSV	Glutenin, high molecular weight (HMW), precursor, wheat (Triticum aestivum), subunit DX5	111_116	44	PLFRLST	Starch debranching enzyme [Precursor],rice (Oryza sativa)	870_876
32	WLYN	Glycinin, fragment, peanut (Arachis hypogaea)	142_145	36	GYYLR	Starch debranching enzyme [Precursor],rice (Oryza sativa)	526_530	31	RYYPSV	Glutenin, high molecular weight (HMW), wheat (Triticum aestivum) subunit 1Dx2.1	111_116	45	LLVPRYS	Glutelin, precursor, rice (Oryza sativa)	93_99
32	WLYN	Glycinin, peanut (Arachis hypogaea)	165_168	37	NIRWW	G10 protein homolog, rice (Oryza sativa)	10_14	31	RYYPSV	Glutenin, high molecular weight (HMW), wheat (Triticum aestivum) subunit (fragment)	111_116	45	LLVPRYS	Glutelin, type B-2, precursor, rice (Oryza sativa)	93_99
32	WLYN	Arachin 6, peanut (Arachis hypogaea)	165_168	38	LLYRY	Lactoferrin binding protein A precursor (Neisseria meningitidis)	448_452	31	RYYPSV	Glutenin, high molecular weight (HMW), wheat (Triticum aestivum) subunit (fragment)	111_116	45	LLVPRYS	Glutelin 8.0/31K , fragments, rice (Oryza sativa)	46_52
33	LFYM	Transmembrane protein, rice (Oryza sativa)	135_138	38	LLYRY	Lactoferrin receptor (Neisseria gonorrhoeae)	447_451	31	RYYPSV	Glutenin, high molecular weight (HMW), wheat (Triticum aestivum) subunit (fragment)	111_116	46	QILRPLF	Gamma-gliadin, wheat (Triticum aestivum)	222_228
34	LYLW	Starch debranching enzyme,rice (Oryza sativa)	216_219	38	LLYRY	Lactoferrin binding protein (Neisseria meningitidis)	444_448	31	RYYPSV	Glutenin, high molecular weight (HMW), wheat (Triticum aestivum) subunit (fragment)	111_116	47	QIMRPLF	Gamma-gliadin, wheat (Triticum aestivum)	274_280
34	LYLW	Starch debranching enzyme [Precursor],rice (Oryza sativa)	216_219	39	NLRYW	1,4-alpha-glucan branching enzyme, chloroplast precursor	393_397	31	RYYPSV	glutenin, high molecular weight (HMW), wheat (Triticum aestivum)	91_96	47	QIMRPLF	Gamma-gliadin, wheat (Triticum aestivum)	193_199
35	NWFM	Transgelin (fragment), smooth muscle protein SM22 (Bos taurus)	130_133	40	WVKLY	Legumin L1 beta chain, fragment, garden pea (Pisum sativum)	51_55	31	RYYPSV	glutenin, high molecular weight (HMW), wheat (Triticum aestivum), fragment (subunit)	108_113	48	WIVKNRL	Lactoferrin binding protein A, (Moraxella catarrhalis)	608_614
36	LFYL	Secretory carrier membran protein, rice (Oryza sativa)	194_197	41	LYRTT	Glutenin, low molecular weight (LMW), precursor, wheat (Triticum aestivum) subunit	288_292	31	RYYPSV	glutenin, high molecular weight (HMW), wheat (Triticum aestivum), fragment (subunit)	103_108	49	RQFMKSL	Lactoferrin binding protein A precursor (Neisseria meningitidis)	203_209
37	LFYW	Putative plasma membrane proton ATPase,rice (Oryza sativa)	734_737	41	LYRTT	Low molecular weight (LMW) glutenin storage protein, wheat (Triticum aestivum)	289_293	31	RYYPSV	glutenin, high molecular weight (HMW), wheat (Triticum aestivum), fragment (subunit BX6.1)	108_113	49	RQFMKSL	Lactoferrin receptor (Neisseria gonorrhoeae)	203_209
37	LFYW	Plasma membrane H+ATPase,rice (Oryza sativa)	734_737	41	LYRTT	Low molecular weight (LMW) glutenin storage protein, wheat (Triticum aestivum)	288_292	31	RYYPSV	glutenin, high molecular weight (HMW), wheat (Triticum aestivum),subunit	111_116	49	RQFMKSL	Lactoferrin binding protein (Neisseria meningitidis)	199_205
38	WWKW	Avenoindoline-a, precursor, oat (Avena sativa)	68_71	41	LYRTT	Glutenin, low molecular weight (LMW), wheat (Triticum aestivum) (subunit)	286_290	31	RYYPSV	glutenin, high molecular weight (HMW), wheat (Triticum aestivum),subunit (fragment)	108_113	50	WIIRQQN	ovostatin precursor (ovomacroglobulin), chicken (Gallus gallus)	1236_1242
39	LYYN	G10 protein homolog, rice (Oryza sativa)	62_65	41	LYRTT	Glutenin, low molecular weight (LMW), wheat (Triticum aestivum) (subunit)	325_329	31	RYYPSV	glutenin, high molecular weight glutenin (HMW), wheat (Triticum aestivum), subunit x (precursor)	108_113	51	LSEGSVT	human lactoferrin (Homo sapiens)	365_371
40	QWYC	alpha-lactalbumin,guinea pig (Cavia porcellus)	117_120	41	LYRTT	Glutenin, low molecular weight (LMW), wheat (Triticum aestivum) (subunit)	374_378	31	RYYPSV	glutenin, high molecular weight glutenin (HMW), wheat (Triticum aestivum), subunit x (precursor)	108_113	51	LSEGSVT	Lactotransferrin precursor (Lactoferrin), human (Homo sapiens)	384_390
41	WFNK	Starch debranching enzyme,rice (Oryza sativa)	808_811	41	LYRTT	Glutenin, low molecular weight (LMW), storage protein, wheat (Triticum aestivum)	216_220	31	RYYPSV	High molecular weight glutenin (HMW) subunit x, precursor, rye (Secale cereale)	108_113	52	ASTTDDC	Lactoferrin, bovine (Bos taurus)	374_380
42	YWMD	1,4-alpha-glucan branching enzyme, chloroplast precursor	396_399	41	LYRTT	glutenin, low molecular weight (LMW), wheat (Triticum aestivum),subunit	257_261	32	LIRLFT	Myoglobin (Bos taurus)	30_35	52	ASTTDDC	Lactoferrin caprine(lactotransferrin), (Capra hircus)	374_380
43	WWNF	cytochrom b (fragment), Pacific Hake (Merluccius productus)	30_33	41	LYRTT	glutenin, low molecular weight (LMW), wheat (Triticum aestivum),subunit (fragment)	286_290	33	KYKVVL	Braching enzyme [Precursor], rice (Oryza sativa)	771_776	52	ASTTDDC	Lactoferrin precursor, bovine (Bos taurus)	393_399
44	VYMF	Glyceraldehyde 3-phosphate dehydrogenase of rainbow trout ( Oncorhynchus mykiss)	43_46	41	LYRTT	glutenin, low molecular weight (LMW), wheat (Triticum aestivum) subunit group 10 type V	286_290	34	RQLIYL	serum albumin, precursor, chicken (Gallus gallus)	242_247	52	ASTTDDC	Lactotransferrin precursor, domestic water buffalo (Bubalus bufalis)	393_399
45	LHWY	Tubulin beta-1 chain, garden pea (Pisum sativum)	395_398	41	LYRTT	glutenin, low molecular weight (LMW), wheat (Triticum aestivum) subunit group 4 type II	279_283	35	VIYRLK	Probable cell division protein ftsW	63_68	52	ASTTDDC	Lactotransferrin precursor (lactoferrin), goat (Capra hircus)	393_399
45	LHWY	Tubulin beta-3 chain , fragment, garden pea (Pisum sativum)	386_389	41	LYRTT	glutenin, low molecular weight (LMW), wheat (Triticum aestivum) subunit group 4 type II	322_326	36	WIYRYL	oleosin, oriental sesame (Sesamum indicum)	97_102	52	ASTTDDC	Lactoferrin (Fragment), bovine, (Bos taurus)	366_372
45	LHWY	Tubulin beta-2 chain, fragment, garden pea (Pisum sativum)	393_396	41	LYRTT	glutenin, low molecular weight (LMW), wheat (Triticum aestivum) subunit group 3 type II (fragment)	244_248	37	RLFTKV	Germin-like protein, fragment, garden pea (Pisum sativum)	110_115	52	ASTTDDC	Lactoferrin (Fragment), bovine, (Bos taurus)	100_106
45	LHWY	Tubulin beta-1 chain, rice (Oryza sativa)	395_398	41	LYRTT	glutenin, low molecular weight (LMW), wheat (Triticum aestivum) subunit group 3 type II (fragment)	220_224	37	RLFTKV	Germin-like protein, fragment, garden pea (Pisum sativum)	110_115	53	VCDESSP	ovomucin beta subunit [fragment], chicken (Gallus gallus)	18_24
45	LHWY	Tubulin beta-2 chain, rice (Oryza sativa)	395_398	41	LYRTT	glutenin, low molecular weight (LMW), wheat (Triticum aestivum) subunit group 3 type II (fragment)	281_285	38	RILQYM	Putative membrane-associated salt-inducible protein, rice (Oryza sativa)	685_690	54	VSEANTC	Disease resistance response protein 230, precursor, garden pea (Pisum sativum)	24_30
45	LHWY	Tubulin beta-3 chain, rice (Oryza sativa)	395_398	41	LYRTT	glutenin, low molecular weight (LMW), wheat (Triticum aestivum) subunit group 3 type II (fragment)	296_300	39	HKLVYI	Glutelin, rice (Oryza sativa)	106_111	55	CSPTADG	Calpain inhibitor (calpastatin) (Bos taurus)	229_235
45	LHWY	Tubulin beta chain, barley (Hordeum vulgare)	395_398	41	LYRTT	glutenin, low molecular weight (LMW), wheat (Triticum aestivum) subunit group 3 type II (fragment)	311_315	40	KKLTFV	Disease resistance response protein Pi176, garden pea (Pisum sativum)	54_59	56	TPECQAA	Hemoglobin beta chain (chicken)	123_129
46	VYFL	eglin c	34_37	41	LYRTT	glutenin, low molecular weight (LMW), wheat (Triticum aestivum) subunit group 3 type II (fragment)	325_329	40	KKLTFV	Disease resistance response protein Pi49, garden pea (Pisum sativum)	54_59	57	CSNGLDE	Glutelin type A III, precursor, rice (Oryza sativa)	303_309
47	CYQW	Lactoferrin caprine(lactotransferrin), (Capra hircus)	19_22	41	LYRTT	glutenin, low molecular weight (LMW), wheat (Triticum aestivum) subunit group 3 type II (fragment)	353_357	40	KKLTFV	Disease resistance response protein DRRG49-C, garden pea (Pisum sativum)	54_59	58	DGTCADS	retinol binding protein RBP, bovine (Bos taurus)	126_132
47	CYQW	Lactotransferrin precursor (lactoferrin), goat (Capra hircus)	38_41	41	LYRTT	glutenin, low molecular weight (LMW), wheat (Triticum aestivum) subunit group 3 type II (fragment)	370_374	41	PWRTVY	OBP,odorant binding protein, bovine (Bos taurus)	16_21	59	TDDVMCA	alpha-lactalbumin,horse (Equus caballus)	86_92
47	CYQW	Lactoferrin, sheep, (Ovis aries)	38_41	41	LYRTT	Glutenin, low molecular weight glutenin (LMW), precursor (fragment), subunit, wheat (Triticum aestiv	363_367	42	KFYTVI	ovotransferrin (conalbumin), precursor, chicken (Gallus gallus)	679_684	60	ENCGDAC	alpha-2-purothionin precursor, wheat (Triticum aestivum)	115_121
47	CYQW	Lactoferrin (Fragment), sheep, (Ovis aries)	19_22	42	RWFFT	60S ribosomal protein L27, garden pea (Pisum sativum)	127_131	43	KFVMKV	chicken connectin (titin), fragment (Gallus gallus)	89_94	60	ENCGDAC	alpha-hordothionin precursor (purothionin II), barley (Hordeum vulgare)	106_112
48	WNFN	legumin 1, mayze (Zea mayze)	354_357	43	YLRQW	Interleukin 21 receptor (precursor), human (Homo sapiens)	519_523	44	RWMLPS	Putative transmembrane protein,rice (Oryza sativa)	162_167	60	ENCGDAC	Purothionin, fragment, wheat (Triticum aestivum)	68_74
49	YYIL	ovostatin precursor (ovomacroglobulin), chicken (Gallus gallus)	486_489	43	YLRQW	Interleukin 21 receptor (precursor), mouse (Mus musculus)	510_514	45	RPFLSW	Lactoferrin caprine(lactotransferrin), (Capra hircus)	133_138	61	CATGDCA	Thaumatin-like pathogenesis-related protein , precursor, oat (Avena sativa)	81_87
50	WQWN	Alpha-amylase/trypsin inhibitor CMb, precursor, barley (Hordeum vulgare)	140_143	44	GLYYR	ovostatin precursor (ovomacroglobulin), chicken (Gallus gallus)	661_665	45	RPFLSW	Lactotransferrin precursor (lactoferrin), goat (Capra hircus)	152_157	61	CATGDCA	Thaumatin-like pathogenesis-related protein , precursor 2, oat (Avena sativa)	81_87
51	ENAC	Glycinin, fragment, peanut (Arachis hypogaea)	6_9	45	WYRPL	Secretory carrier membran protein, rice (Oryza sativa)	173_177	45	RPFLSW	Lactoferrin, sheep, (Ovis aries)	152_157	61	CATGDCA	Thaumatin-like pathogenesis-related protein , precursor 3, oat (Avena sativa)	81_87
51	ENAC	Glycinin, peanut (Arachis hypogaea)	29_32	46	LIRYT	serum albumin, precursor, chicken (Gallus gallus)	436_440	46	PTRYTL	60S ribosomal protein L27, garden pea (Pisum sativum)	82_87	61	CATGDCA	Thaumatin-like protein, precursor, rice (Oryza sativa)	87_93
51	ENAC	Arachin 6, peanut (Arachis hypogaea)	29_32	47	WRWWT	Hordoindoline A-12, fragment, barley (Hordeum vulgare)	60_64	47	IYRYLT	oleosin, oriental sesame (Sesamum indicum)	98_103	62	TLEVESS	Ubiquitin, garden pea (Pisum sativum)	14_20
52	NDCA	Globulin 2, fragment, rice (Oryza sativa)	119_122	47	WRWWT	Hordoindoline A-10, fragment, barley (Hordeum vulgare)	60_64	48	LKFWVF	Chloroplast envelope membrane protein, rice (Oryza sativa)	205_210	62	TLEVESS	Ubiquitin, garden pea (Pisum sativum)	90_96
53	ESDI	Na/K ATPase alpha subunit isoform 2 of rainbow trout (Oncorhynchus mykiss)	817_820	47	WRWWT	Hordoindoline A-13, fragment, barley (Hordeum vulgare)	46_50	48	LKFWVF	Chloroplast envelope membrane protein, rice (Oryza sativa)	205_210	62	TLEVESS	Ubiquitin, garden pea (Pisum sativum)	166_172
54	DECA	beta-lactoglobulin, gen. var. A, fragment (17-177), bovine (Bos taurus)	63_66	47	WRWWT	Hordoindoline A-9, fragment, barley (Hordeum vulgare)	60_64	49	SYKFIP	30 kDa pollen allergen, fragment, barley (Hordeum vulgare)	106_111	62	TLEVESS	Ubiquitin, garden pea (Pisum sativum)	242_248
54	DECA	beta-lactoglobulin, gen. var. H, fragment (17-177), bovine (Bos taurus)	63_66	47	WRWWT	Hordoindoline A-8, fragment, barley (Hordeum vulgare)	60_64	50	WIKYSV	Braching enzyme [Precursor], rice (Oryza sativa)	274_279	62	TLEVESS	Ubiquitin, garden pea (Pisum sativum)	318_324
55	ECTV	ovotransferrin (conalbumin), precursor, chicken (Gallus gallus)	389_392	47	WRWWT	Hordoindoline A-7, fragment, barley (Hordeum vulgare)	60_64	51	NLADTY	Glutelin type A III, precursor, rice (Oryza sativa)	324_329	62	TLEVESS	Ubiquitin, garden pea (Pisum sativum)	394_400
56	GECA	beta-lactoglobulin precursor, goat (Capra hircus)	64_67	47	WRWWT	Hordoindoline A-6, fragment, barley (Hordeum vulgare)	60_64	52	QEFDQA	Starch braching enzyme rbe4, rice (Oryza sativa)	722_727	62	TLEVESS	Ubiquitin, garden pea (Pisum sativum)	14_20
56	GECA	beta-lactoglobulin, sheep (Ovis aries)	64_67	47	WRWWT	Hordoindoline A-5, fragment, barley (Hordeum vulgare)	60_64	53	DGEEGS	Putative leucine-rich repeat transmembrane protein kinase 1,rice (Oryza sativa)	720_725	62	TLEVESS	Ubiquitin, garden pea (Pisum sativum)	90_96
56	GECA	beta-lactoglobulin, gen. var. C, fragment (17-177), bovine (Bos taurus)	63_66	48	KFWKL	OBP,odorant binding protein, bovine (Bos taurus)	131_135	54	MFDTDG	Troponin C, European freshwater eel (Anguilla anguilla)	26_31	62	TLEVESS	Ubiquitin, garden pea (Pisum sativum)	166_172
56	GECA	beta-lactoglobulin, gen. var. D, fragment (17-177), bovine (Bos taurus)	63_66	49	AYYRV	1,4-alpha-glucan branching enzyme, chloroplast precursor	754_758	55	TEFDSA	Induced immature seed protein, common buckwheat (Fagopyrum esculentum)	161_166	62	TLEVESS	Ubiquitin, garden pea (Pisum sativum)	242_248
56	GECA	beta-lactoglobulin, gen. var. E, fragment (17-177), bovine (Bos taurus)	63_66	50	WIIRQ	ovostatin precursor (ovomacroglobulin), chicken (Gallus gallus)	1236_1240	56	DQGHAD	G10 protein homolog, rice (Oryza sativa)	79_84	62	TLEVESS	Ubiquitin, garden pea (Pisum sativum)	318_324
56	GECA	beta-lactoglobulin, gen. var. F, fragment (17-177), bovine (Bos taurus)	63_66	51	TEVMD	Alpha-amylase inhibitor BMAI-1, precursor, fragment, barley (Hordeum vulgare)	103_107	57	DEASGC	Glucocorticoid receptor, rainbow trout ( Oncorhynchus mykiss)	392_397	63	VPELDCS	ovoinhibitor, precursor, chicken (Gallus gallus)	351_357
56	GECA	beta-lactoglobulin, gen. var. G, fragment (17-177), bovine (Bos taurus)	63_66	52	CCDEL	Trypsin/alpha-amylase inhibitor CMX1/CMX3, precursor, wheat (Triticum aestivum)	65_69	58	DADCSG	Calpain regulatory subunit, rainbow trout ( Oncorhynchus mykiss)	130_135	64	EECGSPC	ovomucin beta subunit [fragment], chicken (Gallus gallus)	252_258
56	GECA	beta-lactoglobulin, gen. var. I, fragment (17-177), bovine (Bos taurus)	63_66	52	CCDEL	Trypsin/alpha-amylase inhibitor CMX2, precursor, wheat (Triticum aestivum)	65_69	59	TEPVTL	chicken connectin (titin), fragment (Gallus gallus)	871_876	65	DGNTMVA	ovoinhibitor, precursor, chicken (Gallus gallus)	103_109
56	GECA	beta-lactoglobulin, gen. var. J, fragment (17-177), bovine (Bos taurus)	63_66	52	CCDEL	Conglutin, precursor, peanut (Arachis hypogaea)	79_83	60	DSTTGA	precursor of phytohemagglutinin, runner bean (Phaseolus coccineus)	80_85	66	NTECLAE	Lactotransferrin precursor (Lactoferrin), fragment, horse (Equus caballus)	650_656
56	GECA	beta-lactoglobulin, gen. var. W, fragment (17-177), bovine (Bos taurus)	63_66	53	SCNSE	Precursor of beta-conglycinin, alpha' chain, soybean (Glycine max)	41_45	61	MVDAGI	60 kDa chaperonin	486_491	67	EGENQCA	Lactoferrin, bovine (Bos taurus)	176_182
56	GECA	beta-lactoglobulin, gen. var. B, fragment (17-177), bovine (Bos taurus)	63_66	53	SCNSE	Beta-conglycinin, alpha chain, precursor, soybean (Glycine max)	41_45	62	DGTSSA	Thaumatin-like protein TLP4, barley (Hordeum vulgare)	60_65	67	EGENQCA	Lactoferrin precursor, bovine (Bos taurus)	195_201
57	EDSI	plastocyanin (Populus nigra)	44_47	54	DNVEQ	legumin A precursor (Beta-globulin), upland cotton (Gossypium hirsutum)	397_401	63	NGDEPL	legumin chain B fragment, broad bean (Vicia faba)	9_14	67	EGENQCA	Lactotransferrin precursor, domestic water buffalo (Bubalus bufalis)	195_201
57	EDSI	G10 protein homolog, rice (Oryza sativa)	126_129	55	EDVSQ	A-kinase anchor protein 5 (Bos taurus)	183_187	64	MVEAGI	Putative membrane associated salt-inducible protein,rice (Oryza sativa)	255_260	67	EGENQCA	Lactoferrin (Fragment), bovine, (Bos taurus)	168_174
58	VTGE	Oryzain beta chain, precursor, rice (Oryza sativa)	180_183	56	CDVAE	Putative membrane-associated salt-inducible protein, rice (Oryza sativa)	52_56	65	EASSTG	major urinary protein 1 precursor, mouse (Mus musculus)	20_25	67	EGENQCA	Lactoferrin (Fragment), bovine, (Bos taurus)	125_131
59	ETGV	Probable cell division protein ftsW	366_369	57	TQTDA	Lactoferrin binding protein A, (Moraxella catarrhalis)	45_49	66	VNPESQ	Precursor of G4 glycinin, soybean (Glycine max)	548_553	67	EGENQCA	Lactoferrin (Fragment), bovine, (Bos taurus)	90_96
59	ETGV	Lactoferrin binding protein A, (Moraxella catarrhalis)	111_114	58	NTCEN	Disease resistance response protein 230, precursor, garden pea (Pisum sativum)	28_32	67	NEAAGT	Alpha-amylase inhibitor BDAI-I, precursor, barley (Hordeum vulgare)	135_140	68	EGDMVEC	serum albumin, precursor, chicken (Gallus gallus)	275_281
60	VDLC	Tubulin alpha-1 chain, garden pea (Pisum sativum)	115_118	59	NETDV	Lactoferrin binding protein B, (Moraxella catarrhalis)	376_380	68	EVDPTQ	Tubulin gamma-2 chain, rice (Oryza sativa)	329_334	69	EANTCEN	Disease resistance response protein 230, precursor, garden pea (Pisum sativum)	26_32
60	VDLC	Tubulin alpha-1 chain, rice (Oryza sativa)	115_118	60	DTLAE	11S globulin (b-legumin-like chain), ginkgo (Ginkgo biloba)	202_206	69	DPAIAA	Putative integral membrane protein, rice (oryza sativa)	141_146	70	ECLNACA	Allergen C-C, fragment, wheat (Triticum aestivum)	15_21
60	VDLC	Tubulin alpha-1 chain, barley (Hordeum vulgare)	115_118	61	EDVNN	Plasma membrane H+ATPase,rice (Oryza sativa)	945_949	69	DPAIAA	Putative intergral membrane protein,rice (Oryza sativa)	120_125	71	TEPTVNS	human kappa-casein (Homo sapiens)	124_130
60	VDLC	Tubulin alpha-2 chain, barley (Hordeum vulgare)	115_118	62	NTLAE	Thaumatin-like protein TLP8, barley (Hordeum vulgare)	105_109	69	DPAIAA	Putative intergral membrane protein,rice (Oryza sativa)	147_152	72	ETNDVLS	lectin precursor, french bean (Phaseolus vulgaris)	242_248
60	VDLC	Tubulin alpha-3 chain, barley (Hordeum vulgare)	115_118	63	VSDAT	Putative plasma membrane proton ATPase,rice (Oryza sativa)	613_617	70	EGLLAT	Na/K ATPase alpha subunit isoform 2 of rainbow trout (Oncorhynchus mykiss)	324_329	72	ETNDVLS	phytohemagglutinin precursor, french bean (Phaseolus vulgaris)	240_246
61	SVGE	Gonadoliberolin III precursor, fragment, rainbow trout ( Oncorhynchus mykiss)	29_32	63	VSDAT	Plasma membrane H+ATPase,rice (Oryza sativa)	613_617	71	GDALTL	Hemoglobin alpha chains (horse)	63_68	73	SDEISSA	Putative plasma membrane proton ATPase,rice (Oryza sativa)	758_764
62	GETM	collagen alpha 1(I) chain precursor, chicken (Gallus gallus)	1294_1297	64	QDCSE	ovomucin beta subunit [fragment], chicken (Gallus gallus)	202_206	72	EIESSG	Braching enzyme [Precursor], rice (Oryza sativa)	110_115	73	SDEISSA	Plasma membrane H+ATPase,rice (Oryza sativa)	758_764
63	LCES	Albumin 1 A, precursor, garden pea (Pisum sativum)	75_78	65	ENVTE	Starch braching enzyme rbe4, rice (Oryza sativa)	131_135	73	AGTEAD	Lactotransferrin precursor (Lactoferrin), fragment, horse (Equus caballus)	180_185	74	CEDTSDC	collagen alpha 1(I) chain precursor, chicken (Gallus gallus)	46_52
63	LCES	Albumin 1 B, precursor, garden pea (Pisum sativum)	75_78	66	DEECS	major urinary protein 1 precursor, mouse (Mus musculus)	79_83	74	TPEVDN	beta-lactoglobulin, sheep (Ovis aries)	125_130	75	DVESLPS	Putative leucine-rich repeat transmembrane protein kinase 1,rice (Oryza sativa)	354_360
63	LCES	Albumin 1 C, precursor, garden pea (Pisum sativum)	75_78	67	EDECS	chicken myosin fragment 931-1921 (Gallus gallus)	16_20	75	NVPQET	11S globulin seed storage protein 2, precursor, oriental sesame (Sesamum indicum)	230_235	76	EDHCLAP	Actin 1, rice (Oryza sativa)	318_324
63	LCES	Albumin 1 D, precursor, garden pea (Pisum sativum)	75_78	67	EDECS	Myosin heavy chain, Cyprinus carpio (Common carp) (Q90339)	945_949	76	ALPDTA	Stress-induced protein SAM22, soybean (Glycine max)	90_95	77	VTEDGCT	collagen alpha 1(I) chain precursor, chicken (Gallus gallus)	1377_1383
63	LCES	Albumin 1 E, precursor, garden pea (Pisum sativum)	75_78	68	DTMTE	Calpain inhibitor (calpastatin) (Bos taurus)	272_276	77	QVPEAV	Alpha-amylase inhibitor, wheat (Triticum aestivum)	32_37	78	NAHDSVT	narbonin from Vicia pannonica	263_269
63	LCES	Albumin 1 F, precursor, garden pea (Pisum sativum)	75_78	69	ECCNE	2 S seed storage protein 1, precursor, oriental sesame (Sesamum indicum)	85_89	77	QVPEAV	Alpha-amylase inhibitor, wheat (Triticum aestivum)	33_38	79	DMQDCSE	ovomucin beta subunit [fragment], chicken (Gallus gallus)	200_206
64	DEAC	ovostatin precursor (ovomacroglobulin), chicken (Gallus gallus)	888_891	70	ECNLS	Alpha-amylase/trypsin inhibitor, precursor, barley (Hordeum vulgare)	128_132	77	QVPEAV	Alpha-amylase inhibitor, fragment, wheat (Triticum aestivum)	32_37	80	NPTLECH	ovomucin beta subunit [fragment], chicken (Gallus gallus)	629_635
65	DSAI	human lactoferrin (Homo sapiens)	303_306	71	TDLAN	Probable cell division protein ftsW	255_259	77	QVPEAV	Alpha-amylase inhibitor 0.53, wheat (Triticum aestivum)	32_37	81	VENGCSD	Id1 protein, rainbow trout, (Oncorhynchus mykiss)	114_120
65	DSAI	myosin subfragment-1, chicken (Gallus gallus)	335_338	72	EQVCN	ovostatin precursor (ovomacroglobulin), chicken (Gallus gallus)	338_342	78	STTEGA	Putative plasma membrane proton ATPase,rice (Oryza sativa)	888_893	82	CDNGTEM	Actin 7, rice (Oryza sativa)	11_17
65	DSAI	Lactotransferrin precursor (Lactoferrin), human (Homo sapiens)	322_325	73	DTDAE	Calmodulin-like protein, garden pea (Pisum sativum)	79_83	79	CDTPCE	alpha-lactalbumin,rabbit (Oryctolagus cuniculus)	73_78	83	ESEGCSS	APETAL2-like protein, garden pea (Pisum sativum)	15_21
65	DSAI	ovotransferrin (conalbumin), precursor, chicken (Gallus gallus)	321_324	74	ECPCE	ovomucin beta subunit [fragment], chicken (Gallus gallus)	769_773	80	EVPSTL	Interleukin 21 receptor (precursor), human (Homo sapiens)	309_314	84	DGENCTS	P34 probable thiol protease, precursor, soybean (Glycine max)	289_295
66	QCDI	13S globulin seed storage protein 2, precursor, common buckwheat (Fagopyrum esculentum)	45_48	75	SNDCA	Globulin 2, fragment, rice (Oryza sativa)	118_122	81	EMGTTT	Induced immature seed protein, common buckwheat (Fagopyrum esculentum)	216_221	85	DASSVCE	Teosinte branched1 protein, rice (Oryza sativa)	177_183
66	QCDI	13S globulin seed storage protein 3, precursor, common buckwheat (Fagopyrum esculentum)	43_46	76	SEVAS	tropomyosin 1 alpha chain, chicken (Gallus gallus)	83_87	82	EPEQSL	beta-lactoglobulin precursor, goat (Capra hircus)	112_117	85	DASSVCE	Teosinte branched1 protein [fragment], rice (Oryza sativa)	178_184
66	QCDI	Legumin-like 13S storage protein, fragment, common buckwheat (Fagopyrum esculentum)	33_36	77	EDCTP	Alpha-amylase/trypsin inhibitor CM16, precursor, wheat (Triticum aestivum)	28_32	82	EPEQSL	beta-lactoglobulin, sheep (Ovis aries)	112_117	86	EDTNLCA	Histone H3, garden pea (Pisum sativum)	105_111
67	ETVG	chicken connectin (titin), fragment (Gallus gallus)	288_291	77	EDCTP	Alpha-amylase inhibitor, fragment, rye(Secale cereale)	2_6	82	EPEQSL	beta-lactoglobulin, gen. var. A, fragment (17-177), bovine (Bos taurus)	111_116	86	EDTNLCA	Histone H3, rice (Oryza sativa)	105_111
67	ETVG	Mitochondrial import inner membrane translocase subunit Tim13, rice (Oryza sativa)	35_38	77	EDCTP	Alpha-amylase/trypsin inhibitor CMb, precursor, barley (Hordeum vulgare)	28_32	82	EPEQSL	beta-lactoglobulin, gen. var. C, fragment (17-177), bovine (Bos taurus)	111_116	87	SVDSQTA	ovalbumin, egg albumin, chicken (Gallus gallus)	166_172
68	DVLC	Beta-2 adrenergic receptor, rainbow trout (Oncorhynchus mykiss)	116_119	78	ENVTS	Lectin, precursor, garden pea (Pisum sativum)	216_220	82	EPEQSL	beta-lactoglobulin, gen. var. D, fragment (17-177), bovine (Bos taurus)	111_116	88	ECDGMSE	Interleukin 21 receptor (precursor), mouse (Mus musculus)	337_343
68	DVLC	Putative plasma membrane proton ATPase,rice (Oryza sativa)	331_334	79	ENVST	Beta-2 adrenergic receptor, rainbow trout (Oncorhynchus mykiss)	2_6	82	EPEQSL	beta-lactoglobulin, gen. var. E, fragment (17-177), bovine (Bos taurus)	111_116	89	CAPGSDP	human lactoferrin (Homo sapiens)	494_500
68	DVLC	Plasma membrane H+ATPase,rice (Oryza sativa)	332_335	80	SCLED	Beta-2 adrenergic receptor, rainbow trout (Oncorhynchus mykiss)	186_190	82	EPEQSL	beta-lactoglobulin, gen. var. F, fragment (17-177), bovine (Bos taurus)	111_116	89	CAPGSDP	Lactotransferrin precursor (lactoferrin), Camelus dromedarius (Dromedary) (Arabian camel)	510_516
68	DVLC	Plasma membrane H+ATPase,rice (Oryza sativa)	321_324	81	ENCTS	P34 probable thiol protease, precursor, soybean (Glycine max)	291_295	82	EPEQSL	beta-lactoglobulin, gen. var. G, fragment (17-177), bovine (Bos taurus)	111_116	89	CAPGSDP	Lactotransferrin precursor (Lactoferrin), human (Homo sapiens)	513_519
68	DVLC	Plasma membrane H+ATPase,rice (Oryza sativa)	333_336	82	DCPME	Nodulin 14, precursor, fragment, garden pea (Pisum sativum)	32_36	82	EPEQSL	beta-lactoglobulin, gen. var. H, fragment (17-177), bovine (Bos taurus)	111_116	90	QEDVANS	alpha-lactalbumin, red-necked wallaby (Macropus rufogriseus)	65_71
68	DVLC	Plasma membrane H+ATPase,rice (Oryza sativa)	326_329	83	DDEAC	ovostatin precursor (ovomacroglobulin), chicken (Gallus gallus)	887_891	82	EPEQSL	beta-lactoglobulin, gen. var. I, fragment (17-177), bovine (Bos taurus)	111_116	91	SGEPVSE	Troponin C, European freshwater eel (Anguilla anguilla)	123_129
68	DVLC	Plasma membrane H+ATPase,rice (Oryza sativa)	323_326	84	EDVAN	alpha-lactalbumin, red-necked wallaby (Macropus rufogriseus)	66_70	82	EPEQSL	beta-lactoglobulin, gen. var. J, fragment (17-177), bovine (Bos taurus)	111_116	92	GSEDCTP	Alpha-amylase/trypsin inhibitor CMb, precursor, barley (Hordeum vulgare)	26_32
68	DVLC	Plasma membrane H+ATPase,rice (Oryza sativa)	331_334	85	NECCQ	Avenin precursor, oat (Avena sativa)	80_84	82	EPEQSL	beta-lactoglobulin, gen. var. W, fragment (17-177), bovine (Bos taurus)	111_116	93	TVDMEST	alpha-S2-casein gen. var. A, precursor, bovine (Bos taurus)	153_159
69	ESCL	Lactoferrin binding protein A, (Moraxella catarrhalis)	295_298	86	SCPDA	Thaumatin-like pathogenesis-related protein , precursor 4, oat (Avena sativa)	141_145	82	EPEQSL	beta-lactoglobulin, gen. var. B, fragment (17-177), bovine (Bos taurus)	111_116	93	TVDMEST	alpha S2-casein gen. var. C, fragment (16-222), bovine (Bos taurus)	138_144
70	LCSE	alpha-lactalbumin,horse (Equus caballus)	110_113	87	TCVAD	serum albumin, precursor, bovine (Bos taurus)	76_80	83	CPAESF	Putative membrane-associated salt-inducible protein, rice (Oryza sativa)	913_918	93	TVDMEST	alpha S2-casein gen. var. D, fragment (16-213), bovine (Bos taurus)	129_135
70	LCSE	alpha-lactalbumin,rabbit (Oryctolagus cuniculus)	110_113	88	TDQCE	Glucocorticoid receptor, rainbow trout ( Oncorhynchus mykiss)	615_619	84	MDNCTI	ovomucin beta subunit [fragment], chicken (Gallus gallus)	600_605	94	TDQCEQM	Glucocorticoid receptor, rainbow trout ( Oncorhynchus mykiss)	615_621
70	LCSE	alpha-lactalbumin, sheep (Ovis aries)	110_113	89	TNVES	11S globulin seed storage protein 2, precursor, oriental sesame (Sesamum indicum)	290_294	85	DTTQGD	Lactoferrin binding protein A, (Moraxella catarrhalis)	580_585	95	TEDGCTS	collagen alpha 1(I) chain precursor, chicken (Gallus gallus)	1378_1384
70	LCSE	alpha-lactalbumin, arabian camel (Camelus dromedarius)	110_113	90	ENVQS	Putative transmembrane protein, rice (Oryza sativa)	102_106	86	NETIGG	Lactoferrin binding protein B, (Moraxella catarrhalis)	489_494	96	STPDAVM	Hemoglobin beta chain (human)	49_55
70	LCSE	alpha-lactalbumin, gen. var. B, precursor, bovine (Bos taurus)	129_132	91	NDCAE	Globulin 2, fragment, rice (Oryza sativa)	119_123	87	DDESQC	ovotransferrin (conalbumin), precursor, chicken (Gallus gallus)	435_440	97	CQTGDCA	Thaumatin-like pathogenesis-related protein , precursor 4, oat (Avena sativa)	81_87
70	LCSE	Putative membrane associated salt-inducible protein,rice (Oryza sativa)	309_312	92	DCTAE	ovomucoid, precursor, chicken (Gallus gallus)	169_173	88	EDECSE	chicken myosin fragment 931-1921 (Gallus gallus)	16_21	98	SNDADCS	Calpain regulatory subunit, rainbow trout ( Oncorhynchus mykiss)	128_134
70	LCSE	alpha-lactalbumin, gen. var. A, fragment (20-142), bovine (Bos taurus)	110_113	93	ENLCS	alpha-S2-casein gen. var. A, precursor, bovine (Bos taurus)	48_52	88	EDECSE	Myosin heavy chain, Cyprinus carpio (Common carp) (Q90339)	945_950	99	EDQMNCS	Integral membrane protein OsNramp3 fragment, rice (Oryza sativa)	255_261
70	LCSE	alpha-lactalbumin, gen. var. C, fragment (20-142), bovine (Bos taurus)	110_113	93	ENLCS	alpha S2-casein gen. var. D, fragment (16-213), bovine (Bos taurus)	33_37	89	CSPFEM	Albumin 1 A, precursor, garden pea (Pisum sativum)	33_38	100	EPEALSC	Beta-2 adrenergic receptor, rainbow trout (Oncorhynchus mykiss)	181_187
71	DVAV	cocoa storage protein (Theobroma cacao)	243_246	94	NDTAE	Lactoferrin binding protein B, (Moraxella catarrhalis)	878_882	89	CSPFEM	Albumin 1 B, precursor, garden pea (Pisum sativum)	33_38
71	DVAV	Tubulin alpha-1 chain, garden pea (Pisum sativum)	199_202	95	TEVAD	myosin subfragment-1, chicken (Gallus gallus)	380_384	89	CSPFEM	Albumin 1 D, precursor, garden pea (Pisum sativum)	33_38
71	DVAV	Tubulin alpha-1 chain, rice (Oryza sativa)	199_202	95	TEVAD	Myosin heavy chain, Cyprinus carpio (Common carp) (Q90339)	380_384	89	CSPFEM	Albumin 1 E, precursor, garden pea (Pisum sativum)	33_38
71	DVAV	Tubulin alpha-1 chain, barley (Hordeum vulgare)	199_202	96	DDQAT	A-kinase anchor protein 5 (Bos taurus)	169_173	89	CSPFEM	Albumin 1 F, precursor, garden pea (Pisum sativum)	33_38
71	DVAV	Tubulin alpha-3 chain, barley (Hordeum vulgare)	199_202	97	TECDQ	Hypothetical protein, barley (Hordeum vulgare)	242_246	90	NLPEEV	Glycinin, fragment, peanut (Arachis hypogaea)	466_471
72	QCTD	Vicilin, fragment, garden pea (Pisum sativum)	62_65	98	TDVEN	beta-casein gen. var. A2 (Bos taurus)	128_132	90	NLPEEV	Glycinin, peanut (Arachis hypogaea)	489_494
73	NCAV	Lactoferrin binding protein A precursor (Neisseria meningitidis)	484_487	98	TDVEN	beta-casein gen. var. A3 (Bos taurus)	128_132	90	NLPEEV	Arachin 6, peanut (Arachis hypogaea)	488_493
73	NCAV	Lactoferrin receptor (Neisseria gonorrhoeae)	483_486	98	TDVEN	beta-casein, gen. var. B, bovine (Bos taurus)	128_132	91	EQCPCT	ovomucin beta subunit [fragment], chicken (Gallus gallus)	298_303
73	NCAV	Lactoferrin binding protein (Neisseria meningitidis)	480_483	98	TDVEN	beta-casein gen. var. C (Bos taurus)	128_132	92	CLDLTC	Interleukin 21 receptor (precursor), mouse (Mus musculus)	20_25
74	DVAG	myoglobin	11_14	98	TDVEN	beta-casein gen. var. E (Bos taurus)	128_132	93	DVGACL	serum albumin, precursor, chicken (Gallus gallus)	201_206
74	DVAG	Myoglobin (Bos taurus)	21_24	98	TDVEN	beta-casein gen. var. F (Bos taurus)	128_132	94	VCADGL	ovomucin beta subunit [fragment], chicken (Gallus gallus)	751_756
74	DVAG	Avenoindoline-a, precursor, oat (Avena sativa)	29_32	98	TDVEN	beta-casein gen. var. D, fragment (16-224), bovine (Bos taurus)	128_132	95	EVANPP	Hypothetical protein, barley (Hordeum vulgare)	294_299
75	DCTA	ovomucoid, precursor, chicken (Gallus gallus)	169_172	98	TDVEN	beta-casein gen. var. G, fragment (16-223), bovine (Bos taurus)	128_132	96	AGNEGA	legumin A precursor (Beta-globulin), upland cotton (Gossypium hirsutum)	417_422
76	LDVA	Teosinte branched1 protein, rice (Oryza sativa)	137_140	98	TDVEN	beta-casein gen. var. H1, fragment (16-224), bovine (Bos taurus)	128_132	97	DGTTTA	60 kDa chaperonin	86_91
76	LDVA	Teosinte branched1 protein [fragment], rice (Oryza sativa)	138_141	98	TDVEN	beta-casein gen. var. H2, fragment (16-224), bovine (Bos taurus)	128_132	98	TEDQSG	Na/K ATPase alpha subunit isoform 2 of rainbow trout (Oncorhynchus mykiss)	393_398
77	CDAV	Agglutinin isolectin 2, precursor, bread wheat (Triticum aestivum)	196_199	98	TDVEN	beta-casein gen. var. I, fragment (16-224), bovine (Bos taurus)	128_132	99	STAGDT	Troponin I of cardiac muscle (Bos taurus)	7_12
78	ESVL	lectin precursor, french bean (Phaseolus vulgaris)	219_222	99	DCCQE	Alpha-amylase inhibitor BDAI-I, precursor, barley (Hordeum vulgare)	71_75	100	QSDQGV	glutenin, low molecular weight (LMW), wheat (Triticum aestivum),subunit (fragment)	191_196
79	VCES	Kunitz trypsin inhibitor, runner bean (Phaseolus coccineus)	28_31	100	NELTT	paramyosin (Sarcoptes scabiei) (Q9BMM8)	639_643
79	VCES	A-kinase anchor protein 5 (Bos taurus)	193_196
80	ECGI	ovoinhibitor, precursor, chicken (Gallus gallus)	63_66
80	ECGI	ovoinhibitor, precursor, chicken (Gallus gallus)	128_131
80	ECGI	ovoinhibitor, precursor, chicken (Gallus gallus)	194_197
80	ECGI	ovoinhibitor, precursor, chicken (Gallus gallus)	260_263
81	DVSA	Glutenin, high molecular weight (HMW), precursor, wheat (Triticum aestivum), subunit 12	71_74
81	DVSA	Glutenin, high molecular weight (HMW), wheat (Triticum aestivum) subunit 1Dx10.1	71_74
81	DVSA	Glutenin, high molecular weight (HMW), wheat (Triticum aestivum) subunit	71_74
81	DVSA	Glutenin, high molecular weight (HMW), wheat (Triticum aestivum) subunit	71_74
81	DVSA	glutenin, high molecular weight (HMW), wheat (Triticum aestivum),subunit (fragment)	71_74
81	DVSA	glutenin, high molecular weight (HMW), wheat (Triticum aestivum),subunit (fragment)	71_74
81	DVSA	glutenin, high molecular weight glutenin (HMW), wheat (Triticum aestivum), subunit y (precursor)	71_74
81	DVSA	glutenin, high molecular weight glutenin (HMW), wheat (Triticum aestivum), subunit y (precursor)	71_74
81	DVSA	High molecular weight glutenin (HMW) subunit y, precursor, rye (Secale cereale)	71_74
81	DVSA	Lactoferrin binding protein A precursor (Neisseria meningitidis)	877_880
81	DVSA	Lactoferrin receptor (Neisseria gonorrhoeae)	877_880
81	DVSA	Lactoferrin binding protein (Neisseria meningitidis)	874_877
82	DVVA	11S globulin (b-legumin-like chain), ginkgo (Ginkgo biloba)	130_133
82	DVVA	legumin 1, mayze (Zea mayze)	162_165
82	DVVA	11S globulin seed storage protein G3 precursor , common sunflower (Helianthus annuus)	143_146
82	DVVA	12S seed storage globulin (precursor), oat (Avena sativa)	161_164
82	DVVA	11S globulin, precursor, oat (Avena sativa)	161_164
82	DVVA	11S globulin, oat (Avena sativa)	161_164
82	DVVA	13S globulin, fragment, common buckwheat (Fagopyrum esculentum)	148_151
82	DVVA	legumin A , precursor, garden pea (Pisum sativum)	480_483
82	DVVA	Glutelin type A III, precursor, rice (Oryza sativa)	161_164
82	DVVA	Glutelin type A III, precursor, rice (Oryza sativa)	453_456
82	DVVA	Glutelin, precursor, rice (Oryza sativa)	450_453
82	DVVA	Glutelin, type B-1, precursor, rice (Oryza sativa)	450_453
82	DVVA	Glutelin, type B-2, precursor, rice (Oryza sativa)	157_160
82	DVVA	Glutelin, type B-2, precursor, rice (Oryza sativa)	446_449
82	DVVA	Glutelin, rice (Oryza sativa)	466_469
82	DVVA	Glycinin, fragment, peanut (Arachis hypogaea)	150_153
82	DVVA	Glycinin, peanut (Arachis hypogaea)	173_176
82	DVVA	Arachin 6, peanut (Arachis hypogaea)	173_176
83	NCSA	Oryzain gamma chain, precursor, rice (Oryza sativa)	128_131
84	CDVA	Putative membrane-associated salt-inducible protein, rice (Oryza sativa)	52_55
85	SCVE	Convicilin, precursor, garden pea (Pisum sativum)	406_409
85	SCVE	Convicilin, precursor, garden pea (Pisum sativum)	448_451
86	ECVG	Alpha-amylase inhibitor BDAI-I, precursor, barley (Hordeum vulgare)	58_61
86	ECVG	Lactoferrin binding protein A, (Moraxella catarrhalis)	795_798
87	DSVA	chicken connectin (titin), fragment (Gallus gallus)	47_50
87	DSVA	Myosin heavy chain, Cyprinus carpio (Common carp) (Q90339)	1199_1202
88	VDSA	Lactoferrin, bovine (Bos taurus)	314_317
88	VDSA	Lactoferrin caprine(lactotransferrin), (Capra hircus)	314_317
88	VDSA	Lactoferrin precursor, bovine (Bos taurus)	333_336
88	VDSA	Glucocorticoid receptor, rainbow trout ( Oncorhynchus mykiss)	235_238
88	VDSA	Desmin, fragment, rainbow trout ( Oncorhynchus mykiss)	200_203
88	VDSA	Lactotransferrin precursor, domestic water buffalo (Bubalus bufalis)	333_336
88	VDSA	Lactotransferrin precursor (lactoferrin), goat (Capra hircus)	333_336
88	VDSA	Lactoferrin, sheep, (Ovis aries)	333_336
88	VDSA	Lactoferrin (Fragment), bovine, (Bos taurus)	306_309
88	VDSA	Lactoferrin (Fragment), bovine, (Bos taurus)	98_101
88	VDSA	Lactoferrin (Fragment), bovine, (Bos taurus)	39_42
89	DVCA	retinol binding protein RBP, bovine (Bos taurus)	68_71
90	VDVA	Disease resistance response protein Pi176, garden pea (Pisum sativum)	74_77
90	VDVA	Disease resistance response protein Pi49, garden pea (Pisum sativum)	74_77
90	VDVA	Starch debranching enzyme,rice (Oryza sativa)	162_165
90	VDVA	Starch debranching enzyme [Precursor],rice (Oryza sativa)	162_165
91	ECGA	Hemoglobin beta chain (chicken)	22_25
92	ESGV	Avenin precursor, oat (Avena sativa)	183_186
93	TDVA	Tubulin alpha-1 chain, garden pea (Pisum sativum)	198_201
93	TDVA	Tubulin alpha-1 chain, rice (Oryza sativa)	198_201
93	TDVA	Tubulin alpha-1 chain, barley (Hordeum vulgare)	198_201
93	TDVA	Tubulin alpha-3 chain, barley (Hordeum vulgare)	198_201
94	DCVL	Lactoferrin, bovine (Bos taurus)	424_427
94	DCVL	Lactoferrin caprine(lactotransferrin), (Capra hircus)	424_427
94	DCVL	Lactoferrin precursor, bovine (Bos taurus)	443_446
94	DCVL	Lactotransferrin precursor, domestic water buffalo (Bubalus bufalis)	443_446
94	DCVL	Lactotransferrin precursor (lactoferrin), goat (Capra hircus)	443_446
94	DCVL	Lactoferrin, sheep, (Ovis aries)	443_446
94	DCVL	Lactoferrin (Fragment), bovine, (Bos taurus)	416_419
95	ESVC	Hypothetical protein, garden pea (Pisum sativum)	329_332
96	ECSV	Globulin, barley (Hordeum vulgare)	213_216
97	ECSI	gamma-gliadin precursor, wheat (Triticum aestivum)	309_312
97	ECSI	Gamma-gliadin, wheat (Triticum aestivum)	237_240
97	ECSI	Gamma-gliadin, wheat (Triticum aestivum)	291_294
97	ECSI	Gamma-gliadin, wheat (Triticum aestivum)	259_262
97	ECSI	Gamma-gliadin, wheat (Triticum aestivum)	259_262
97	ECSI	Gamma-gliadin, wheat (Triticum aestivum)	259_262
97	ECSI	Gamma-gliadin, wheat (Triticum aestivum)	259_262
97	ECSI	Gamma-gliadin, wheat (Triticum aestivum)	309_312
97	ECSI	Gamma-gliadin, fragment, wheat ( Triticum aestivum ssp. sphaerococcum)	261_264
97	ECSI	Gamma-gliadin, fragment, wheat ( Triticum aestivum ssp. sphaerococcum)	256_259
97	ECSI	Gamma-gliadin, fragment, wheat ( Triticum aestivum ssp. sphaerococcum)	264_267
97	ECSI	Gamma-gliadin, fragment, wheat ( Triticum aestivum ssp. compactum)	280_283
97	ECSI	Gamma-gliadin, fragment, wheat ( Triticum aestivum ssp. compactum)	258_261
98	ECTL	Nodulin, fragment, garden pea (Pisum sativum)	38_41
98	ECTL	ovoinhibitor, precursor, chicken (Gallus gallus)	391_394
99	DCAL	Lactotransferrin precursor, domestic water buffalo (Bubalus bufalis)	321_324
100	QDCC	Seed allergenic protein RA14, precursor, rice (Oryza sativa)	78_81
100	QDCC	Seed allergenic protein RA17, precursor, rice (Oryza sativa)	75_78
100	QDCC	Seed allergenic protein RAG1, precursor, fragment, rice (Oryza sativa)	75_78
100	QDCC	Seed allergenic protein RAG2, precursor, rice (Oryza sativa)	79_82
100	QDCC	Allergenic protein, rice (Oryza sativa) [japonica cultivar-group]	79_82
100	QDCC	Allergenic protein, fragment, rice (Oryza sativa) [japonica cultivar-group]	72_75
100	QDCC	Allergenic protein, fragment, rice (Oryza sativa) [japonica cultivar-group]	24_27
100	QDCC	Allergenic protein, fragment, rice (Oryza sativa) [japonica cultivar-group]	22_25
100	QDCC	Allergenic protein, fragment, rice (Oryza sativa) [japonica cultivar-group]	26_29
